# Supplementary material for: Insertion sequence transposition inactivates CRISPR-Cas immunity
Source: PubMed Central journal article supplement (PMC10359306; doi:10.1038/s41467-023-39964-7), 2023-07-20
Supplement: 41467_2023_39964_MOESM1_ESM.pdf [file 41467_2023_39964_MOESM1_ESM.pdf]

## Supplementary Information

### Insertion sequence transposition inactivates CRISPR-Cas immunity

Yong Sheng,<sup>1,4</sup> Hengyu Wang,<sup>1,4</sup> Yixin Ou,<sup>1,2</sup> Yingying Wu,<sup>1,3</sup> Wei Ding,<sup>1</sup> Meifeng Tao,<sup>1,2</sup> Shuangjun Lin,<sup>1,2</sup> Zixin Deng,<sup>1,2,\*</sup> Linqun Bai,<sup>1,\*</sup> and Qianjin Kang<sup>1,2,\*</sup>

<sup>1</sup>State Key Laboratory of Microbial Metabolism, Joint International Research Laboratory of Metabolic & Developmental Sciences, and School of Life Sciences & Biotechnology, Shanghai Jiao Tong University, Shanghai 200240, China.

<sup>2</sup>Haihe Laboratory of Synthetic Biology, Tianjin, 300308, China

<sup>3</sup>National Engineering Research Center of Edible Fungi, Key Laboratory of Applied Mycological Resources and Utilization (South), Ministry of Agriculture and Rural Affairs, Institute of Edible Fungi, Shanghai Academy of Agricultural Sciences, Shanghai 201403, PR China.

<sup>4</sup>These authors contributed equally

\*Corresponding authors. E-mails: qjkang@sjtu.edu.cn (Q.J.K.),

bailq@sjtu.edu.cn (L.Q.B.) and zxdeng@sjtu.edu.cn (Z.X.D.)

# Supplementary Figures

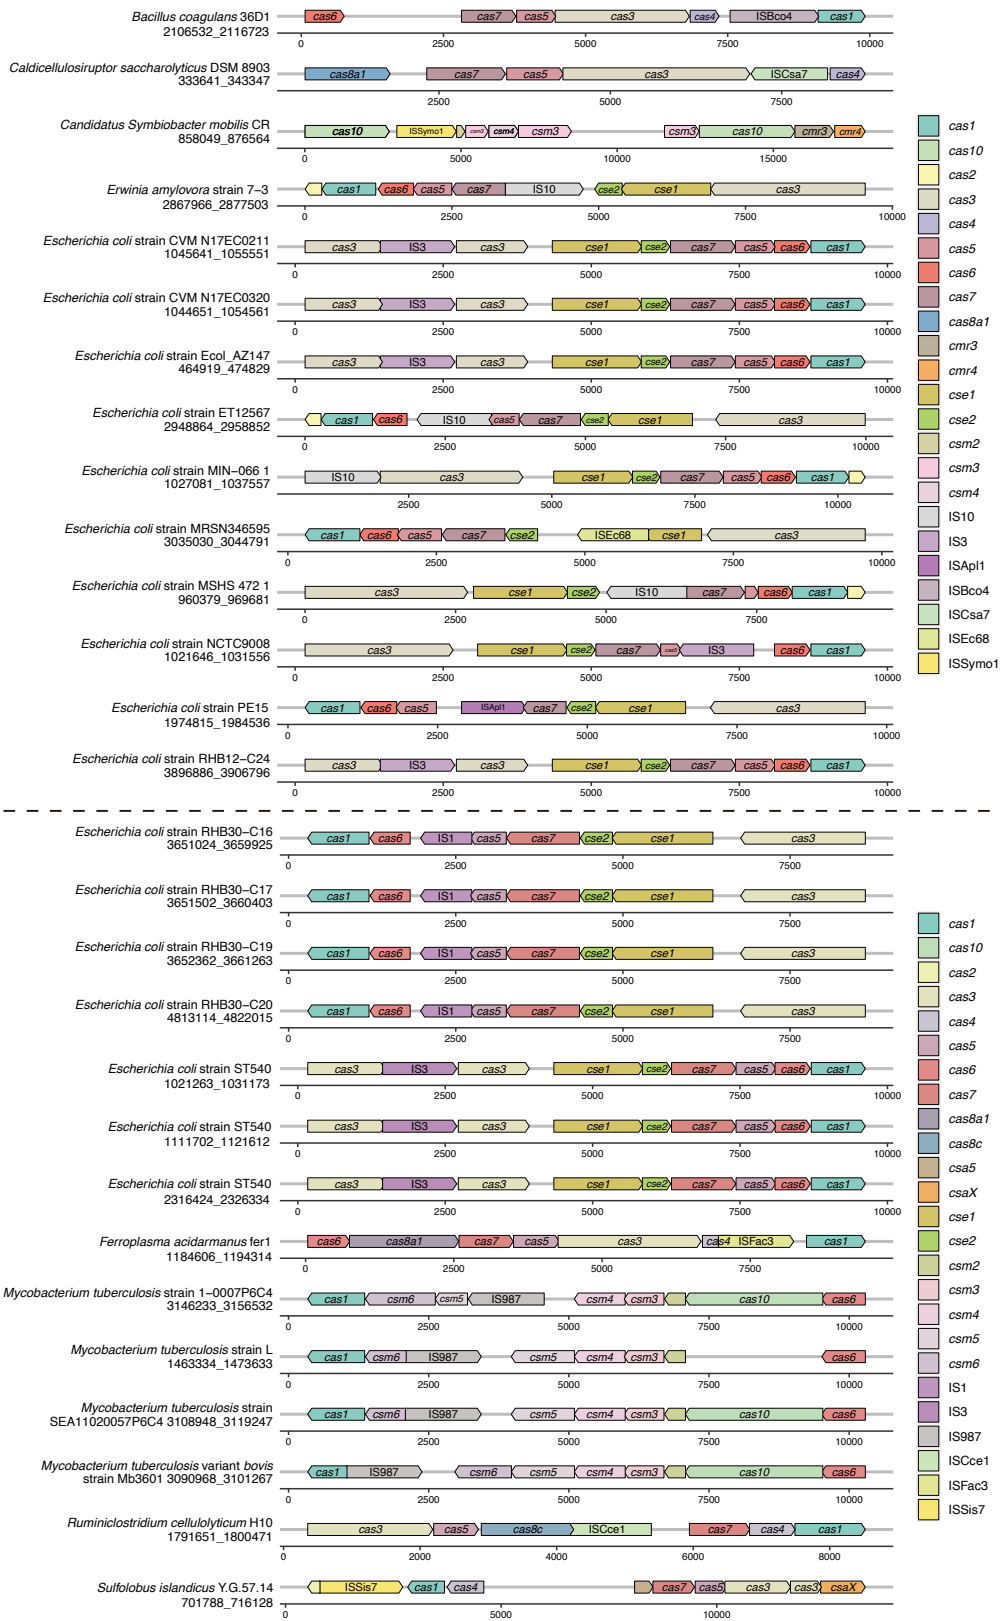

**Figure S1. Identification of naturally occurring transpositions of ISs into *cas* genes based on ISfinder database. All 28 identified transposition events are shown above.**

Each IS element in the figure represents a unique IS type.

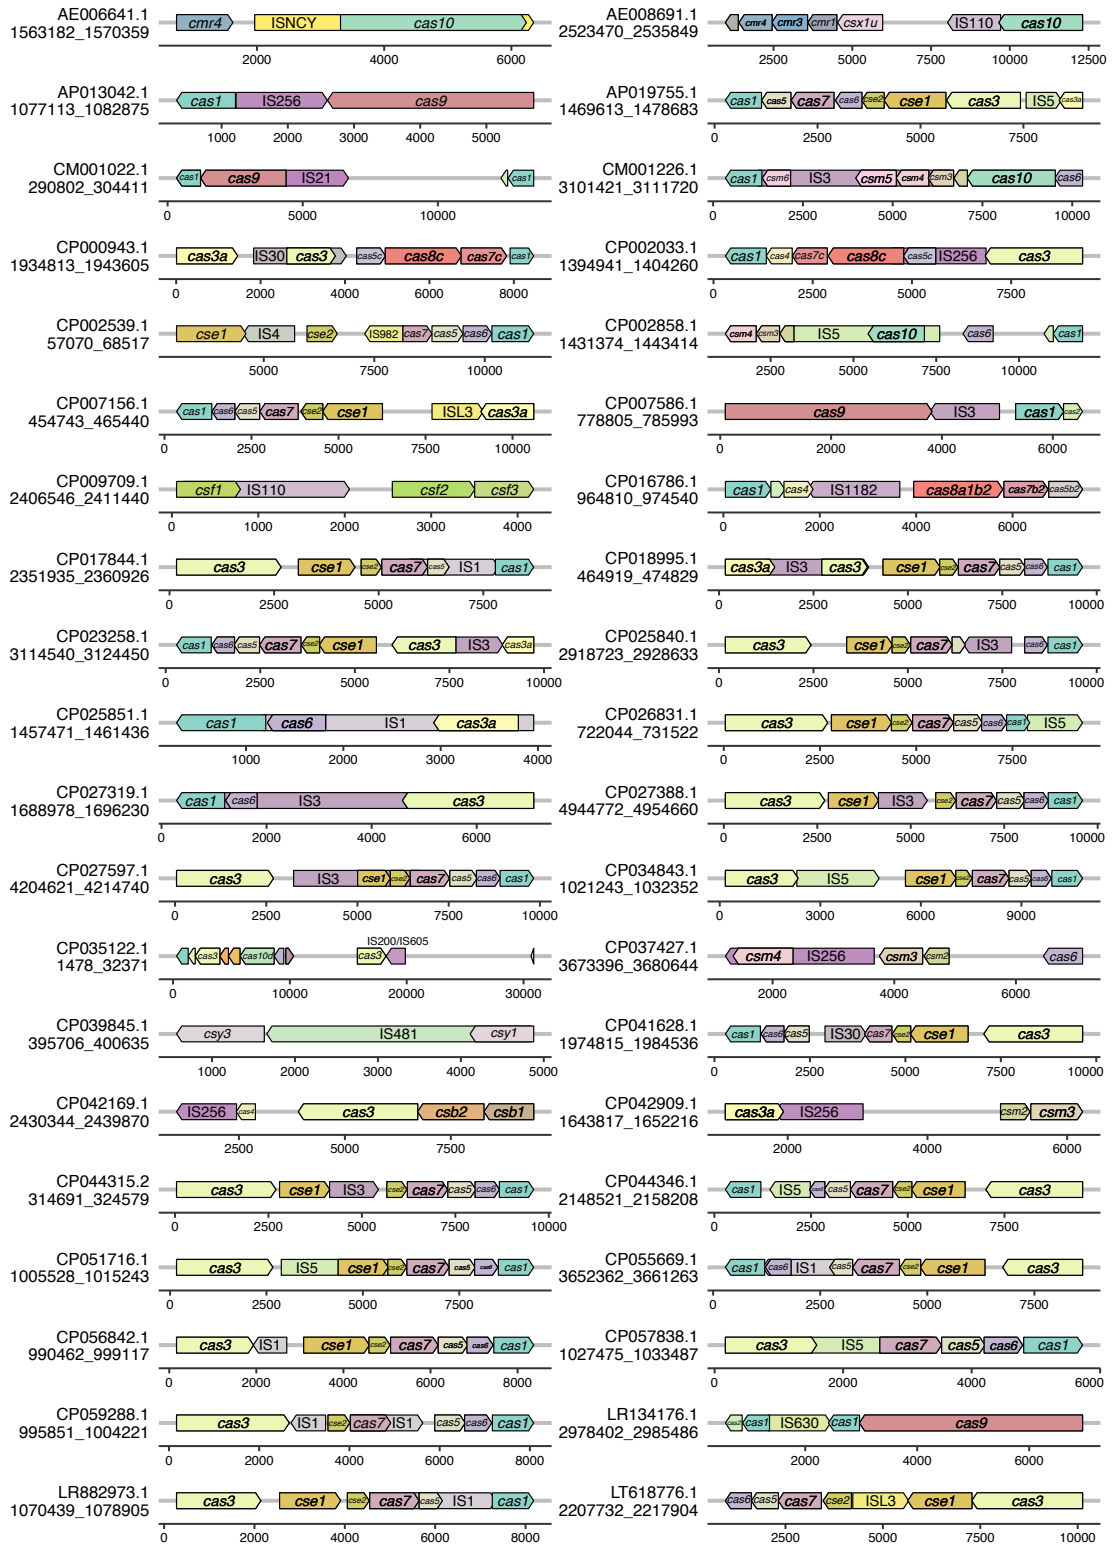

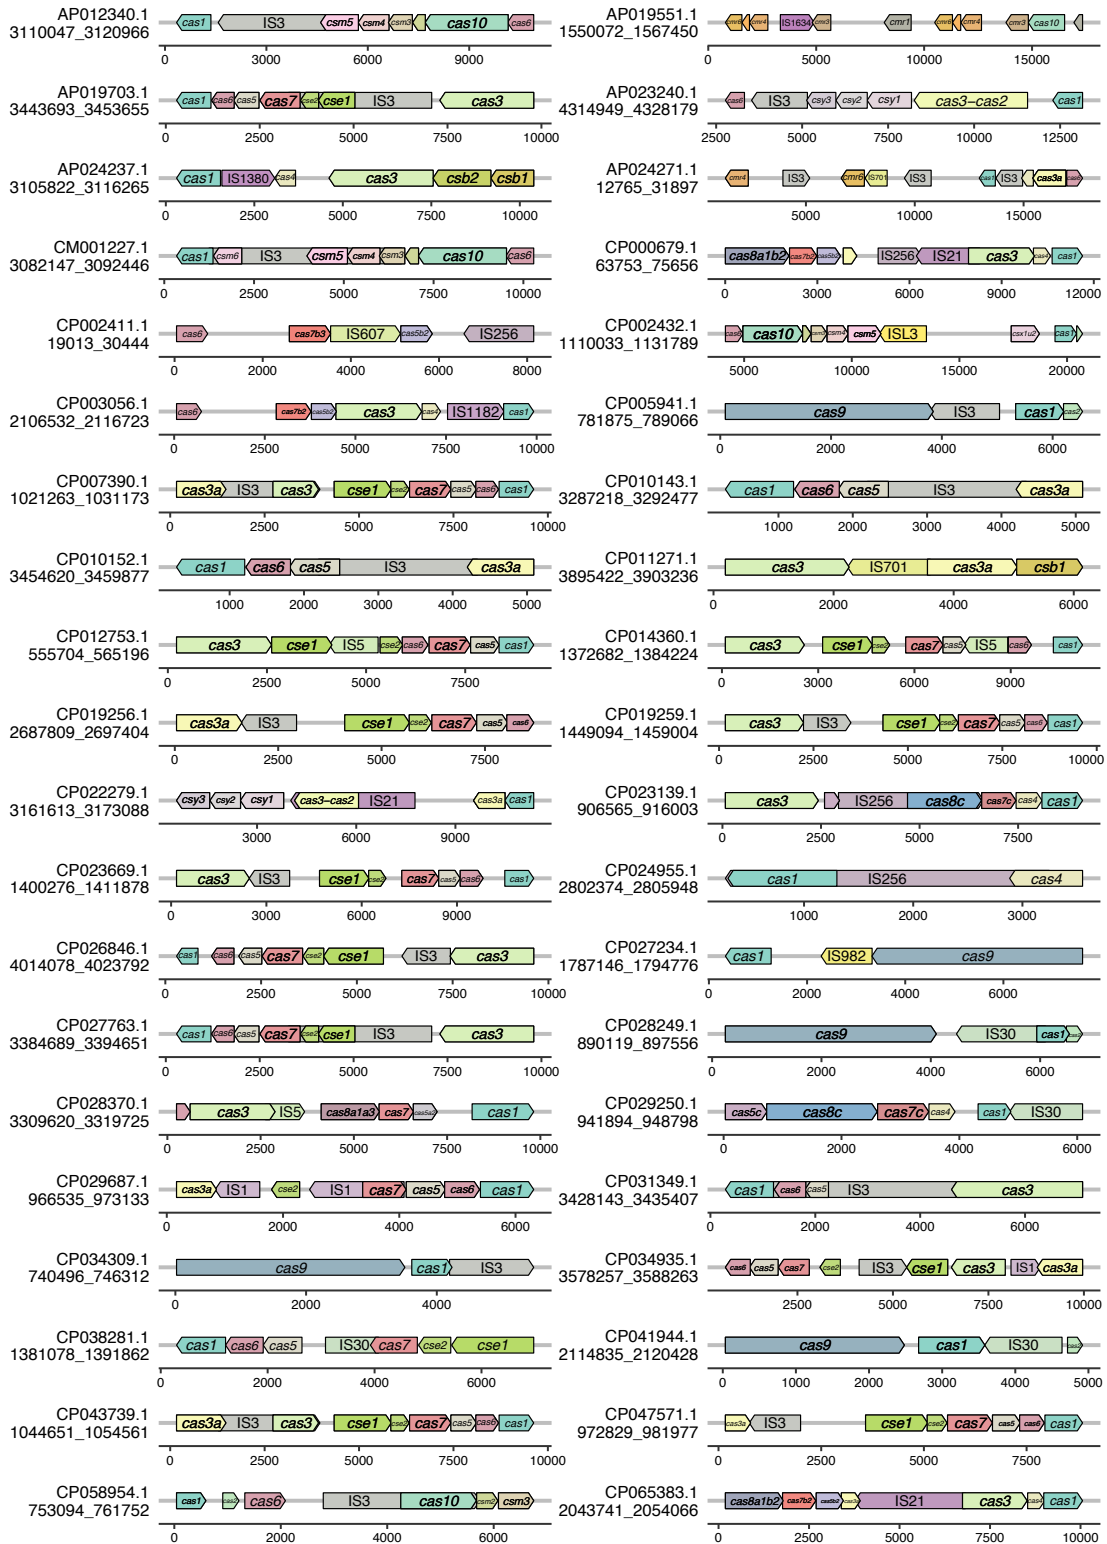

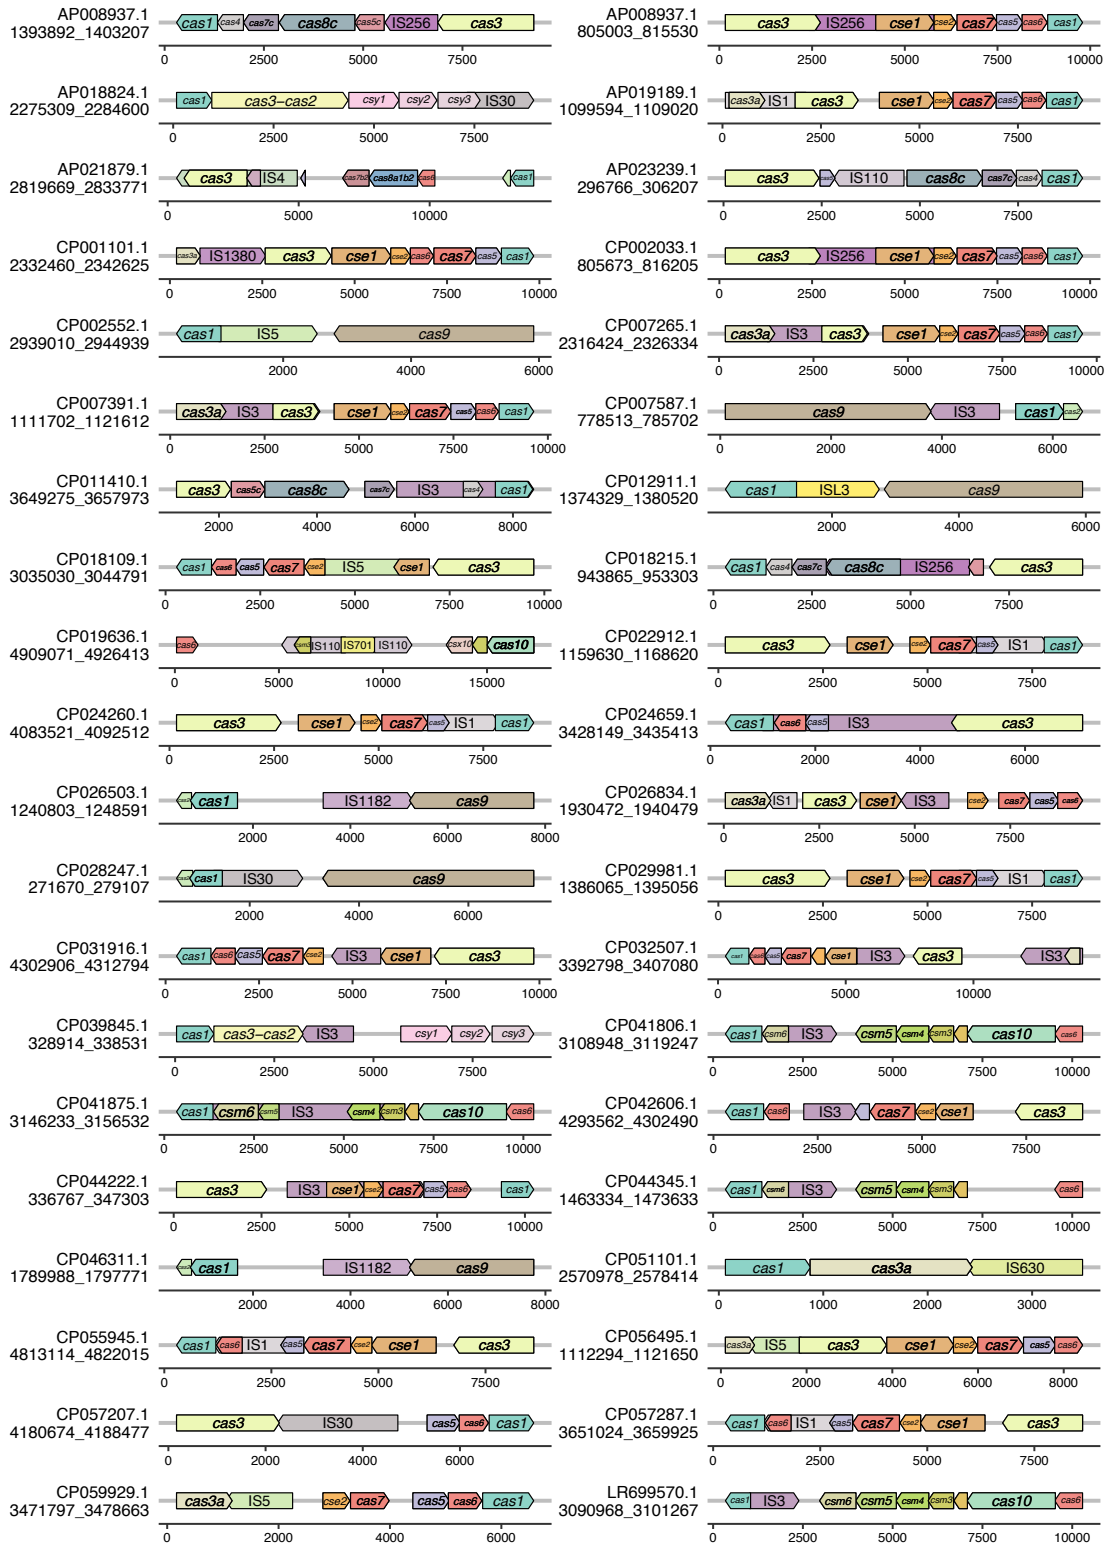

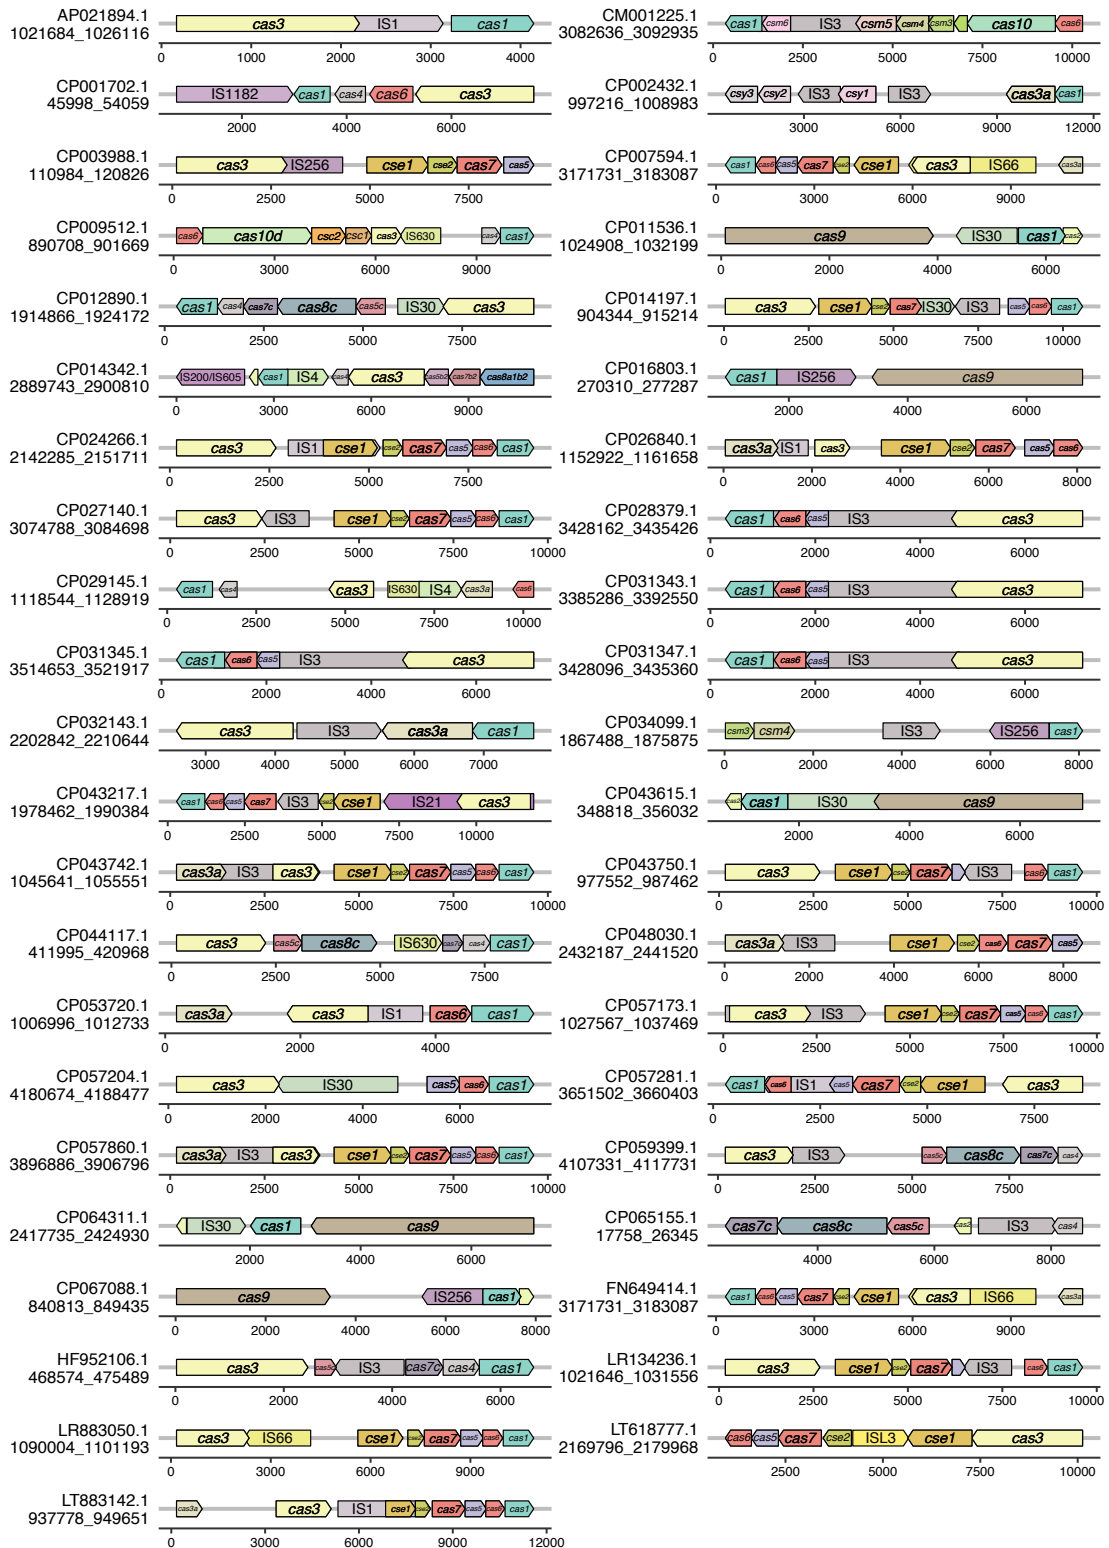

**Figure S2. Identification of naturally occurring transpositions of ISs into *cas* genes using a highly sensitive software pipeline, ISEScan. A total of 163 transposition events are shown above. Each IS element in the figures represents a unique IS family.**

Horizontal axes indicate the relative position of each gene or IS within the targeted genomic region.



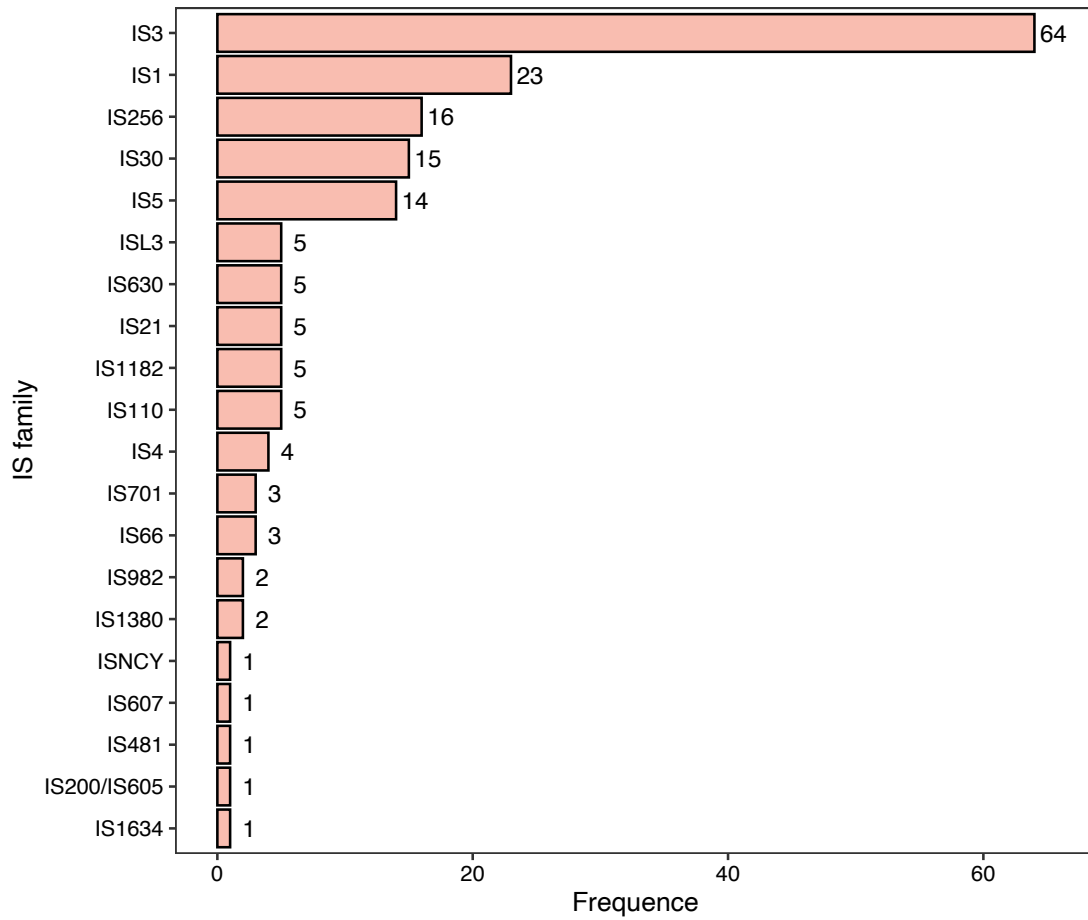

**Figure S3. Analysis of ISs engagement in 163 cases of naturally occurring transpositions of ISs into *cas* genes.** It is important to note that certain transposition events within the analyzed cases involve the participation of multiple IS families, rather than a single IS family.

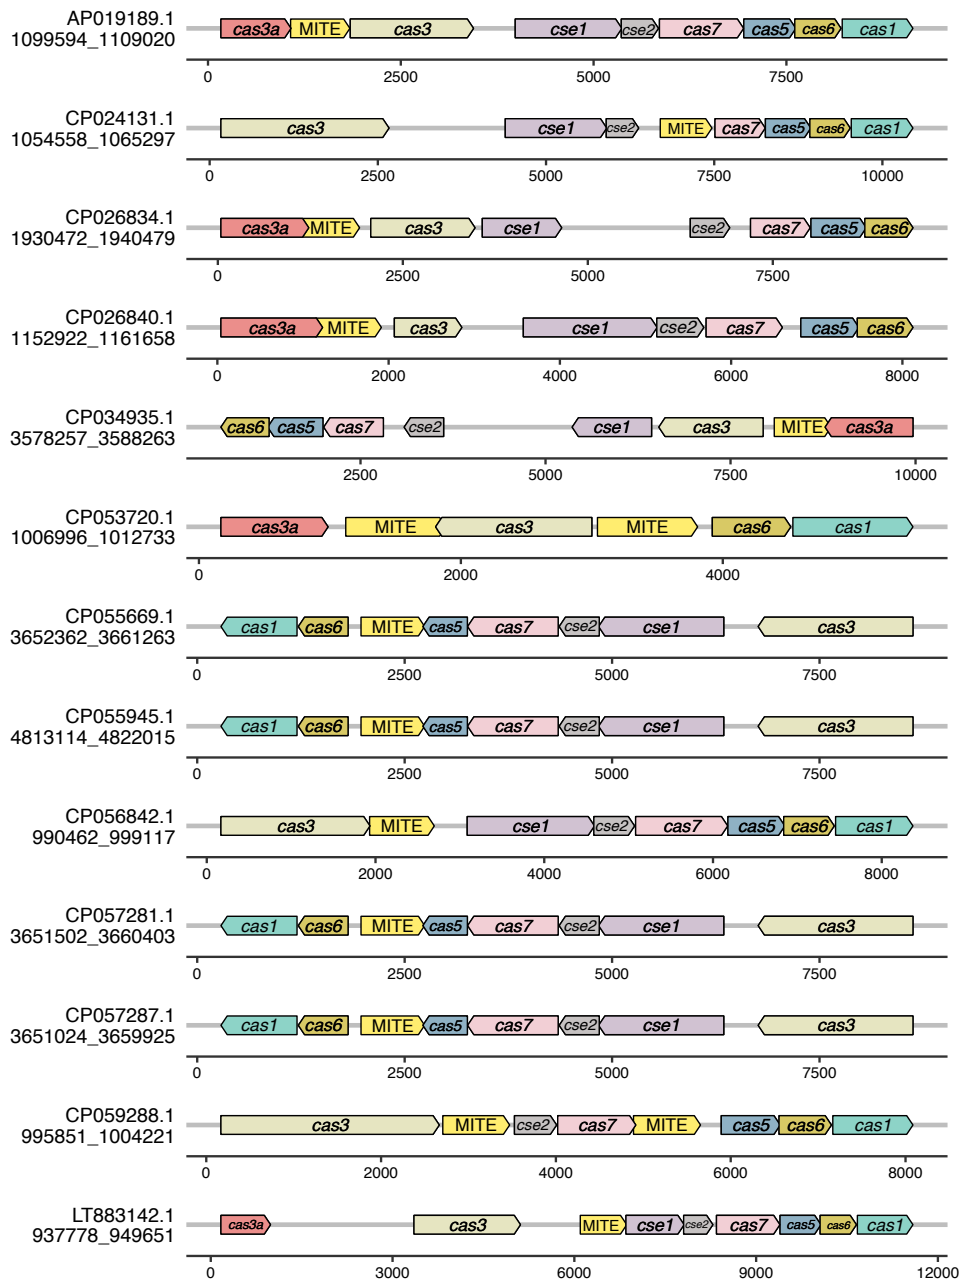

**Figure S4. Naturally occurring transpositions of MITEs into *cas* genes.** Horizontal axes indicate the relative position of each gene or MITE within the targeted genomic region.

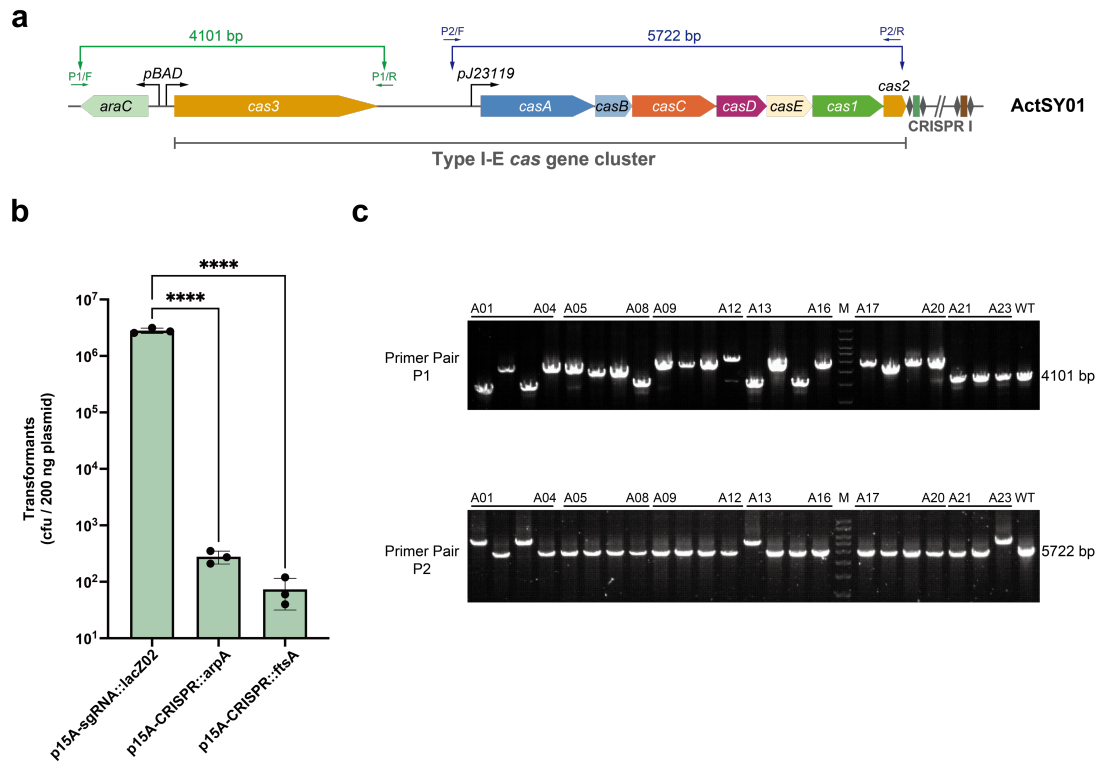

**Figure S5. ISs mediate the fitness trade-off between the benefits of acquiring plasmids and the genotoxicity induced by the type I-E CRISPR/Cas system of *E. coli* DH10B under antibiotic pressure.** **a** Schematic of the engineered type I-E CRISPR-Cas locus of *E. coli* DH10B. The strain ActSY01 was generated by replacing the native promoters of *casABCDEF12* operon and *cas3* with a constitutive promoter J23119 and an arabinose-inducible promoter (*pBAD*), respectively. Primer pairs P1 and P2 were designed to amplify the entire *cas* cluster of the strain ActSY01; expected amplicon sizes are shown. **b** In the presence of L-arabinose induction, transformation efficiencies of p15A-sgRNA::lacZ02 (control, lacking the targeting spacer for the type I-E CRISPR/Cas system), p15A-CRISPR::arpA (targeting the non-essential gene *arpA* of the strain ActSY01) and p15A-CRISPR::ftsA (targeting the essential gene *ftsA* of the strain ActSY01) into the strain ActSY01 were determined through counting CFUs per 200 ng of plasmids. Error bars denote means  $\pm$  S.D. from three biological replicates;

\*\*\*\*,  $P < 0.0001$ , using two-tailed unpaired t-test;  $P = 9.03e-05$ ,  $9.03e-05$  (from top to bottom). Source data are provided as a Source Data file. **c** Colony PCR screening with primer pairs P1 and P2 for IS insertions into the *cas* cluster of the 23 escapers (A01-A23). Lanes “WT”, control amplicons with the strain ActSY01 template; larger PCR products suggest IS transposition events. Except for samples A8, A15, A21 and A22, IS insertions were detected within the *cas* genes of all other 19 samples. Detailed information regarding the IS types involved in transposition and their resulting TSD sequences can be found in Table S4. The experiment was conducted independently three times and yielded consistent results. Source data are provided as a Source Data file.

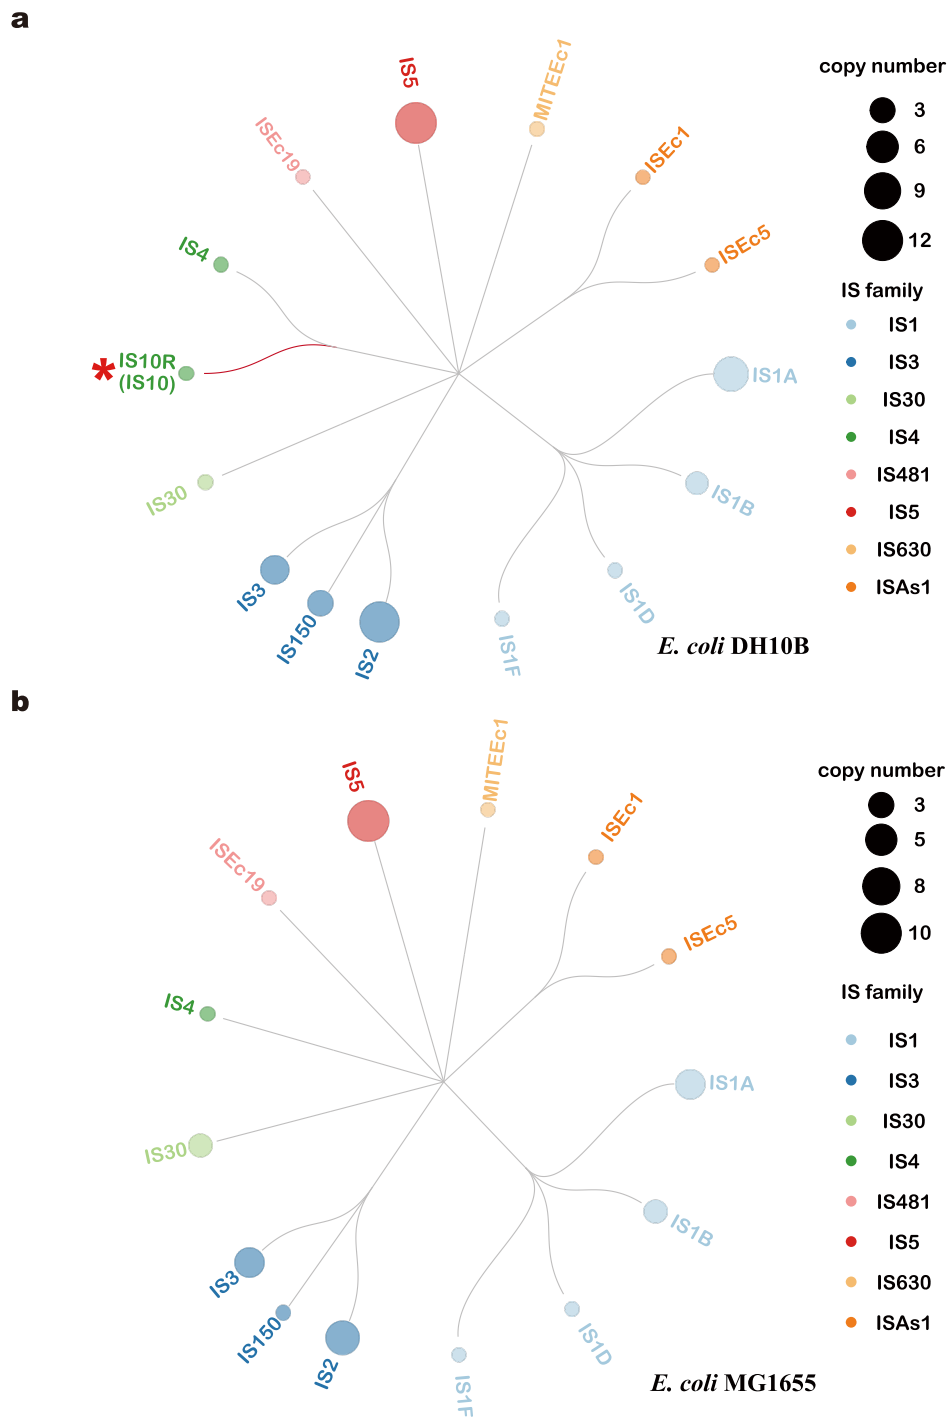

**Figure S6. Analysis of the diversity and copy number of different insertion sequences within *E. coli* DH10B (a) and *E. coli* MG1655 (b). Each colored circle represents a specific IS family, and the circle size reflects the copy number of the IS element on the chromosome with a larger size indicating greater copy number. Except for the IS10 element, the same ISs were detected in both strains.**

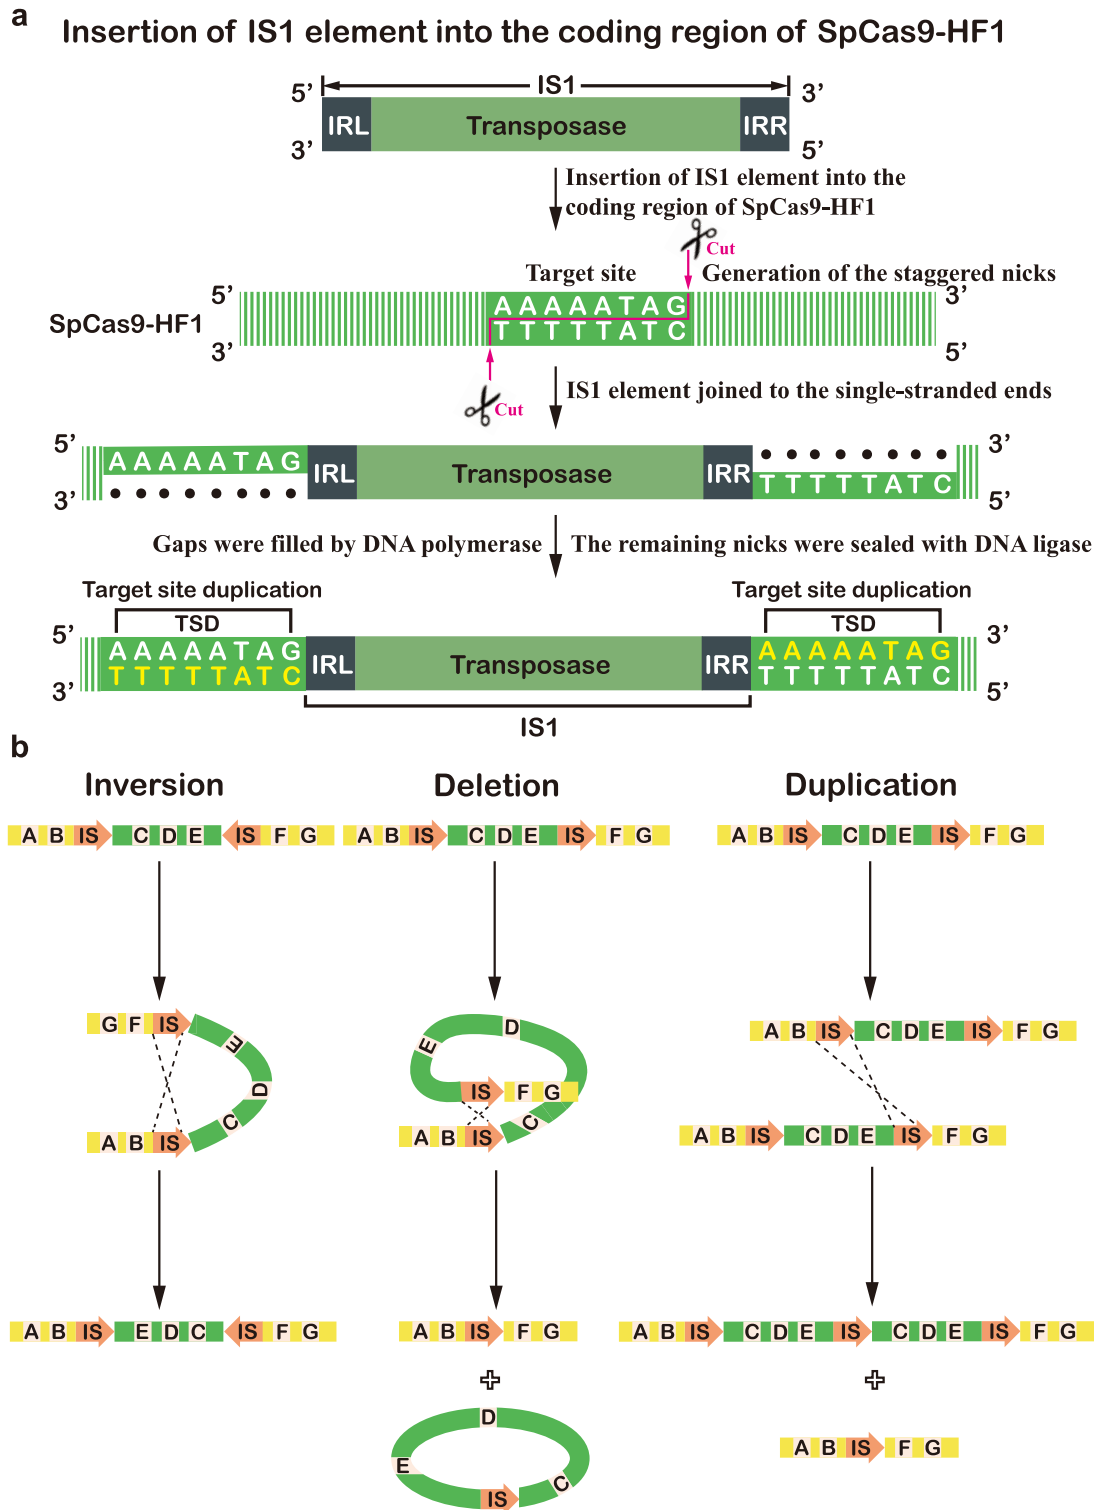

**Figure S7. Schematic illustrations of the process for ISs insertion into the coding region of the Cas protein (a) and of the DNA rearrangements resulting from homologous recombination between two identical IS elements (b). a** Transposition

example showing the insertion of IS1 into the coding region of SpCas9-HF1. IS1 is composed of the internal transposase flanked at both ends by two inverted repeats (IRL and IRR). The transposase cleaves at the target site within the coding region of SpCas9-HF1 and introduces the staggered nicks, followed by joining to the resulting single-stranded ends. Subsequently, the DNA gaps are filled by DNA polymerase, and the remaining nicks are sealed with DNA ligase, generating an 8 bp or 9 bp target site duplication around IS1 within the SpCas9-HF1 coding region. **b** Inversion, deletion, and duplication of the DNA segment resulting from recombination between two copies of the same IS element. The intervening sequence is likely inverted by homologous recombination when an IS element is inserted into the target sequence in two opposite orientations, whereas copies of the IS element in the same orientation may trigger either deletion or duplication of the intervening sequence.

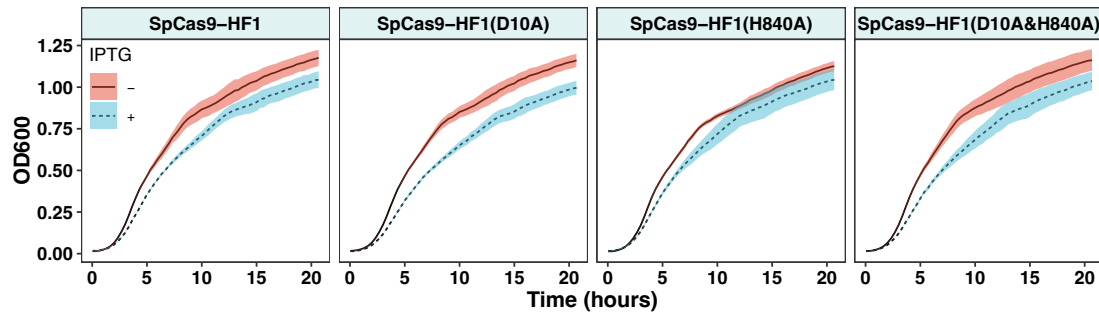

**Figure S8. The mere induction of Cas protein expression does not lead to noticeable growth defects in the host strains.** Growth curves of the strains encoding different Cas protein variants under both IPTG-induced and non-induced conditions. Shaded areas indicate the means  $\pm$  S.D. from five biological replicates. Source data are provided as a Source Data file.



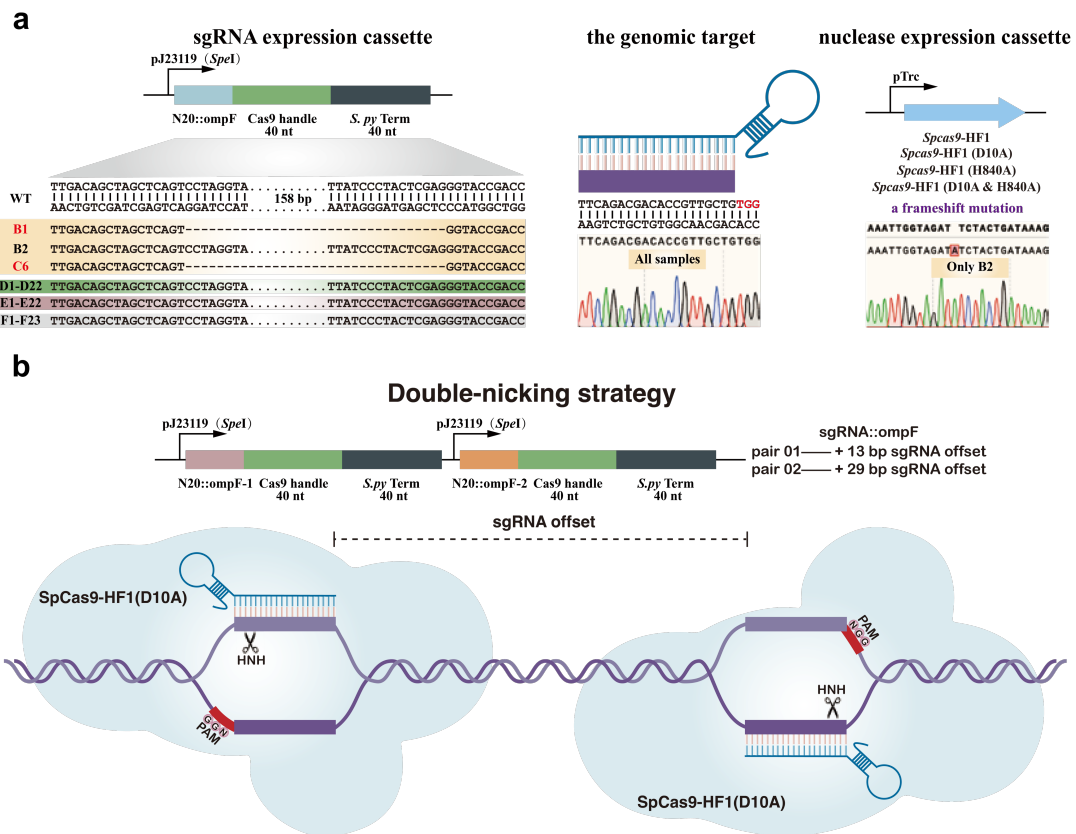

**Figure S9. Identification of mutations in the CRISPR-tolerant mutants (a) and schematic illustration of the CRISPR double-nicking strategy (b).** a Except for the colonies with IS insertions into the *cas* gene, all the remaining CRISPR-tolerant mutants (targeted by sgRNA::ompF) described in Figure 4c were further analyzed to determine the other factors that enabled escape from CRISPR-Cas interference. All genetic components necessary for the proper functioning of CRISPR-Cas system, including the sgRNA expression cassette, the genomic target, and the nuclease expression cassette, were sequenced by the Sanger method. Sequence analysis revealed a deletion mutation within the sgRNA expression cassettes of the mutant B1 and C6, as well as a frameshift mutation within the coding region of SpCas9-HF1 of the mutant B2, all of which led to their escape from SpCas9-HF1-mediated DSB. However, in contrast to SpCas9-HF1, the variants containing mutated nuclease domains, including

SpCas9-HF1 (D10A), SpCas9-HF1 (H840A), and SpCas9-HF1 (D10A & H840A), were unable to induce any detectable mutations which might potentially compromise CRISPR-Cas systems, indicating that they were incapable of triggering genotoxic stress.

**b** The CRISPR double-nicking strategy with two pair of offset sgRNAs. The schematic depiction of the staggered DSB formation by SpCas9-HF1 (D10A) nickase in the presence of paired sgRNAs.

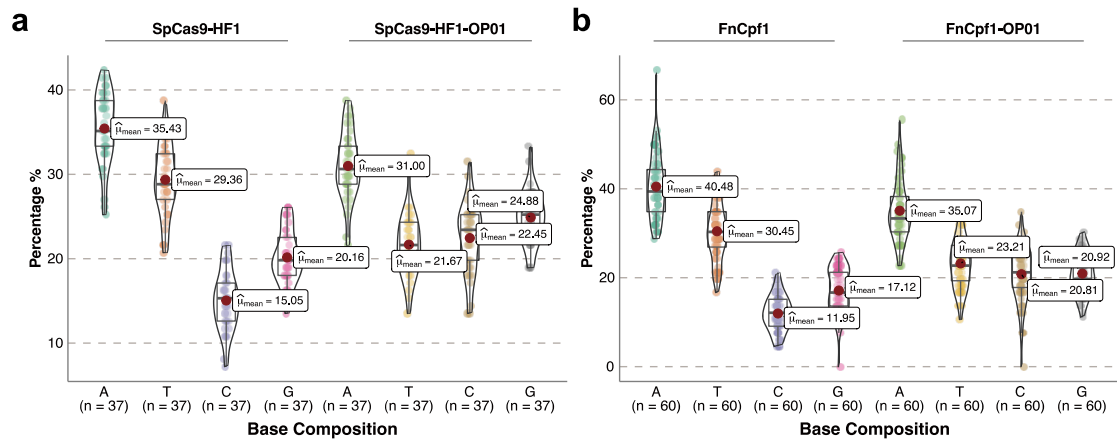

**Figure S10. Comparison of base composition between the coding regions of SpCas9-HF1 and SpCas9-HF1-OP01 (a), and FnCpf1 and FnCpf1-OP01 (b).** To determine the local base composition features within a nucleotide sequence, the coding regions of SpCas9-HF1, SpCas9-HF1-OP01, FnCpf1, and FnCpf1-OP01 were individually divided into 37, 37, 60, and 60 fragments, respectively, and the strand bias in nucleotide composition was computed for each segment. The total number of samples analyzed was indicated under each boxplot ( $n = 37$  for SpCas9-HF1 and SpCas9-HF1-OP01;  $n = 60$  for FnCpf1 and FnCpf1-OP01). The boxplots show medians (midlines), interquartile ranges (boxes) and ranges (whiskers).

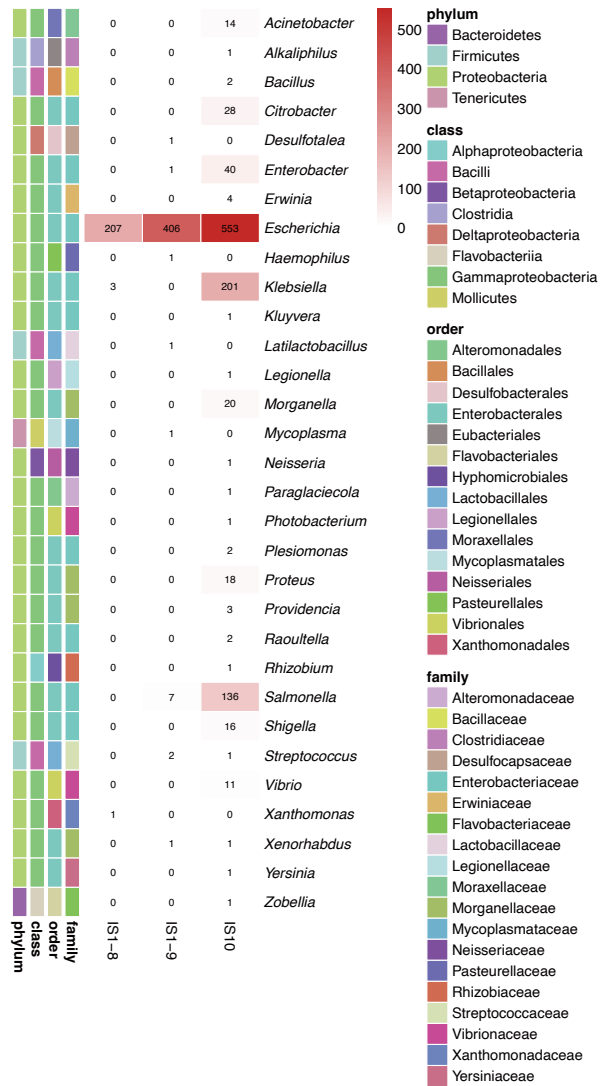

**Figure S11. Enrichment analysis of the naturally occurring transposition events of IS1 and IS10 across bacterial taxonomic groups.** The number of genomes per genus in which IS1 or IS10 had been transposed is indicated by a color gradient, and the actual numbers are displayed in boxes.

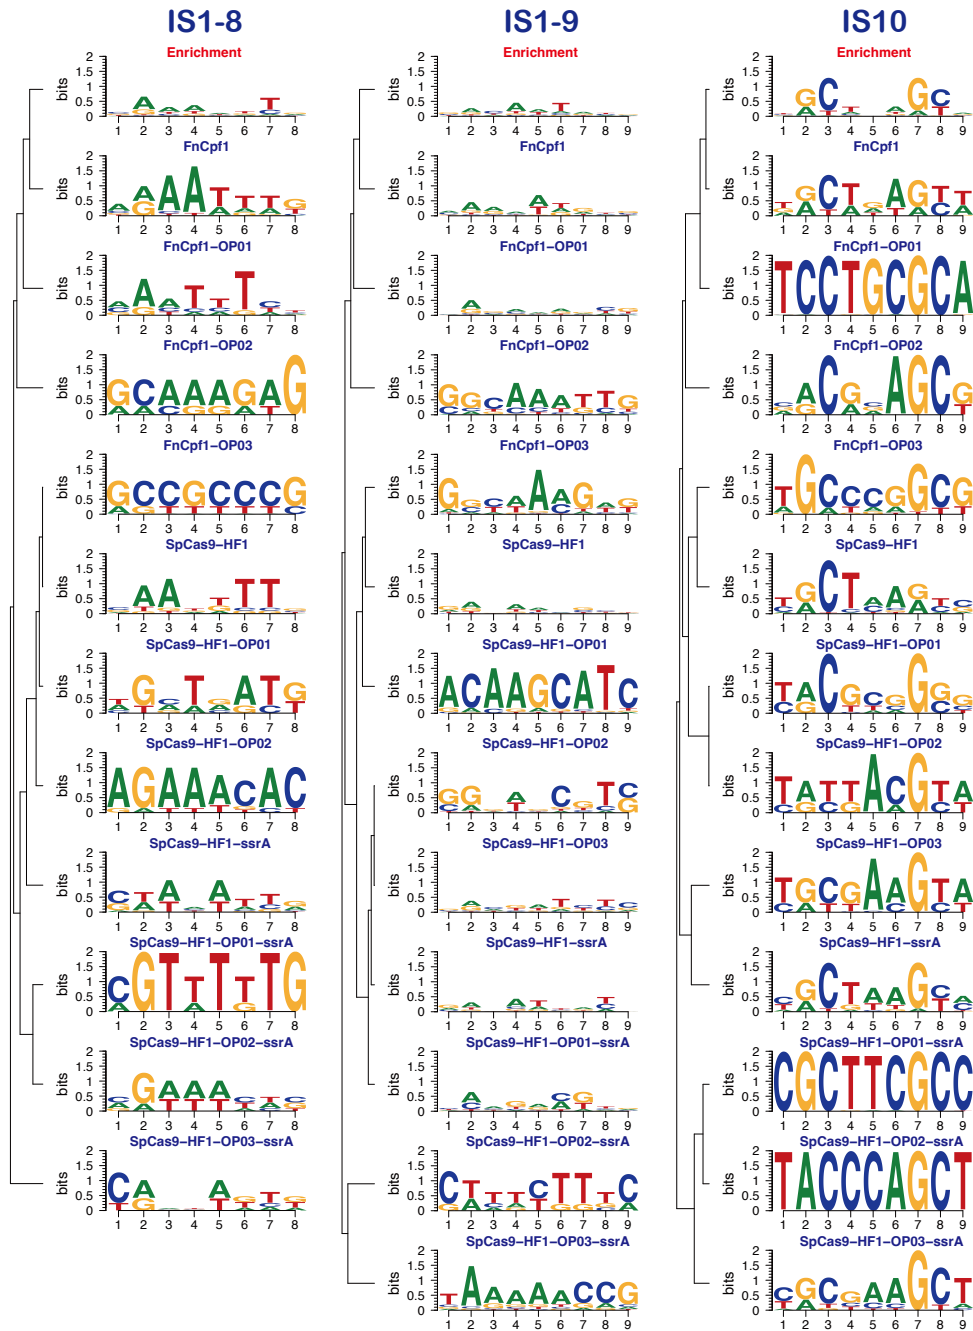

**Figure S12. Comprehensive comparison of various TSD motifs generated by IS1 and IS10 within all constructed *cas* genes.** Naturally occurring TSD motifs are labeled with “Enrichment” in red text (in reference to their enrichment/retrieval through bioinformatics analysis), and the name of each *cas* gene from which TSD sequences were collected is marked above the corresponding sequence logo.

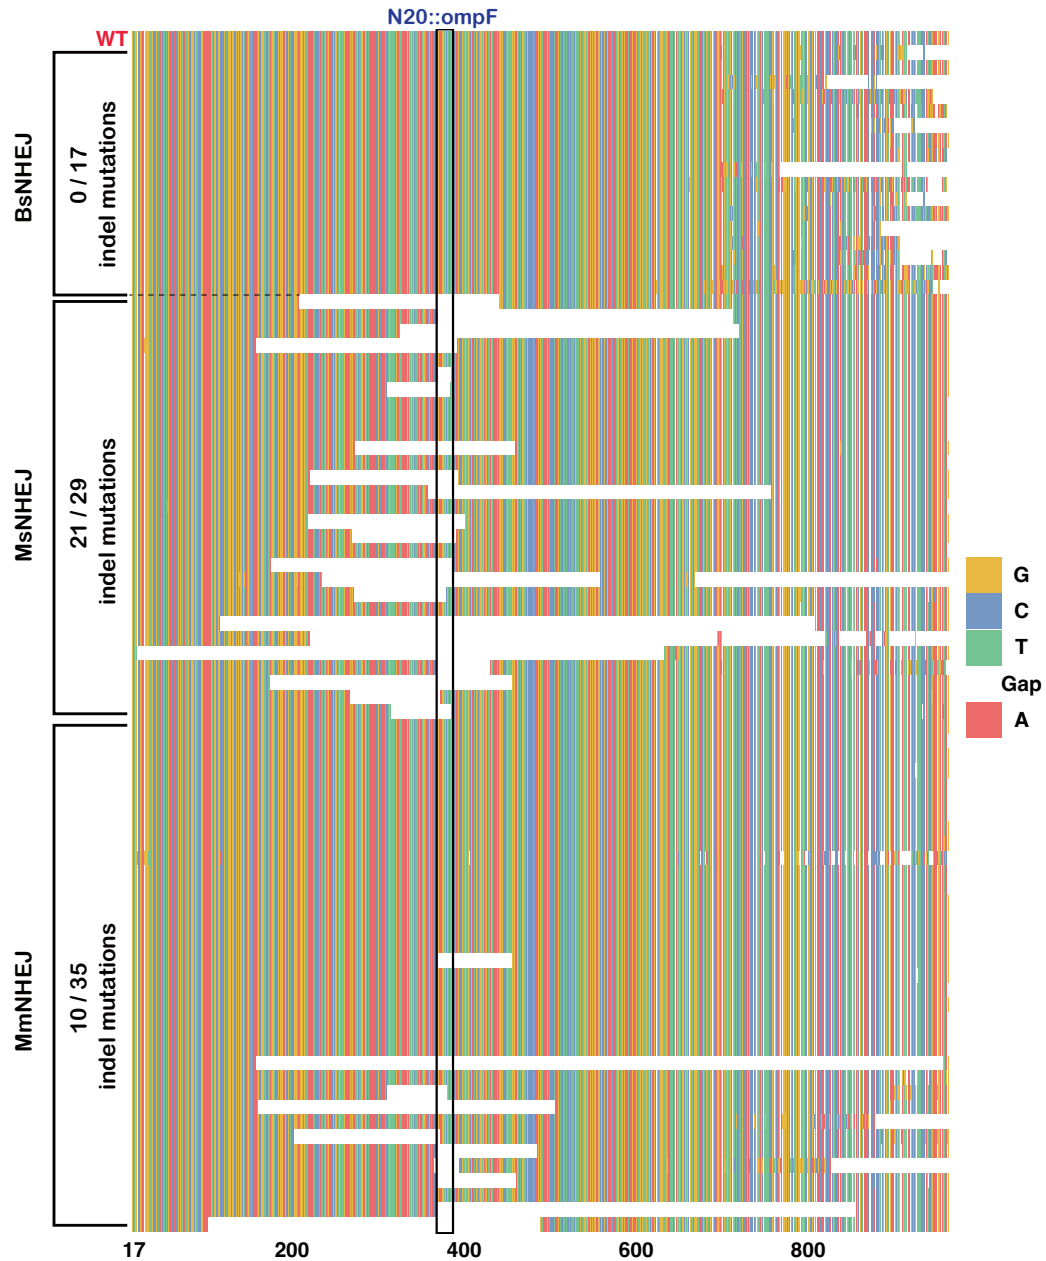

**Figure S13. Detection of targeted indel mutations induced by NHEJ repair.** The sgRNA targeting site (N20::ompF) is marked with a black rectangle, and the sequencing result from WT (without CRISPR/Cas-induced DSB) served as the control. A series of pixels was used to represent each nucleotide sequence, and the four distinct colors represent each base (A, T, C, G). Note that only the confidence intervals of sequencing results should be considered.

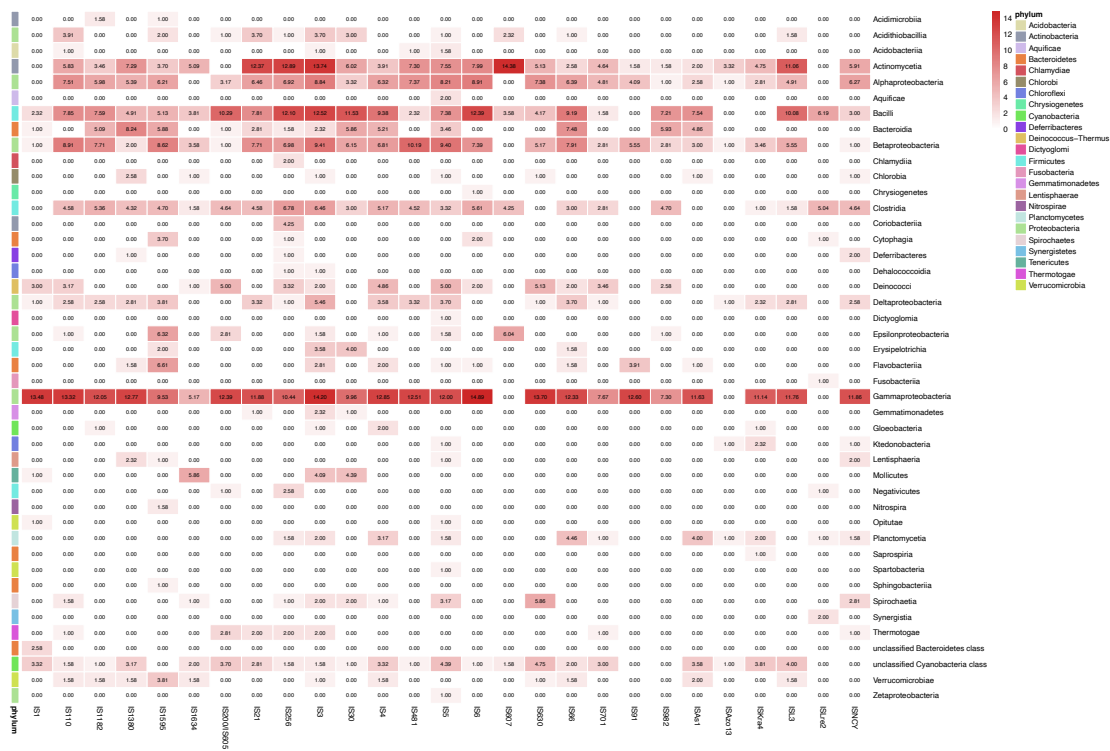

**Figure S14. Diversity distribution of different IS families across bacterial taxonomic groups.** The number of genomes per class containing a specific IS family is indicated by the color gradient from white (less) to firebrick red (more). Due to the different scales of the values within the heatmap analysis, the numbers in boxes were log-transformed ( $\log_2(x+1)$ ) for better visualization.

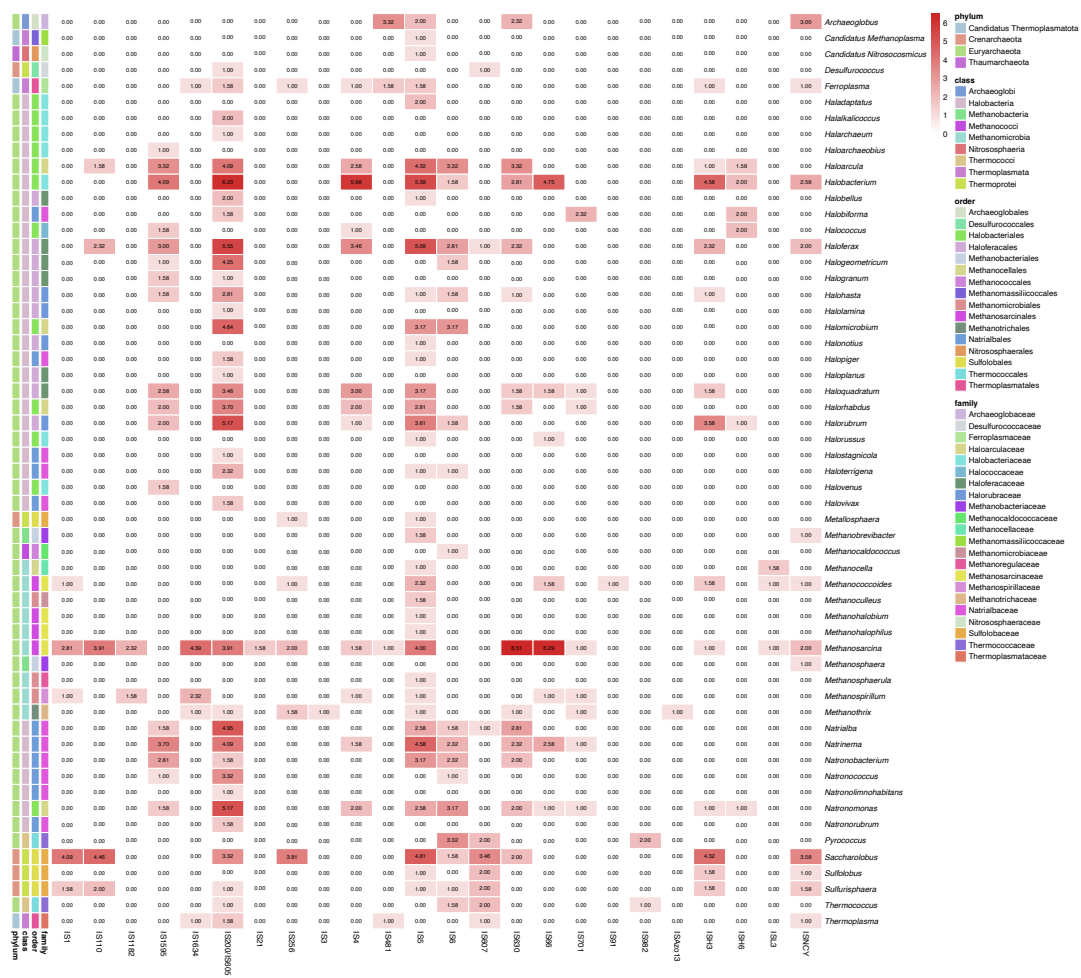

**Figure S15. Diversity distribution of different IS families across archaeal taxonomic groups.** The number of genomes per genus containing a specific IS family is indicated by the scaled color coding. The values in boxes were log-transformed ( $\log_2(x+1)$ ) for better visualization.



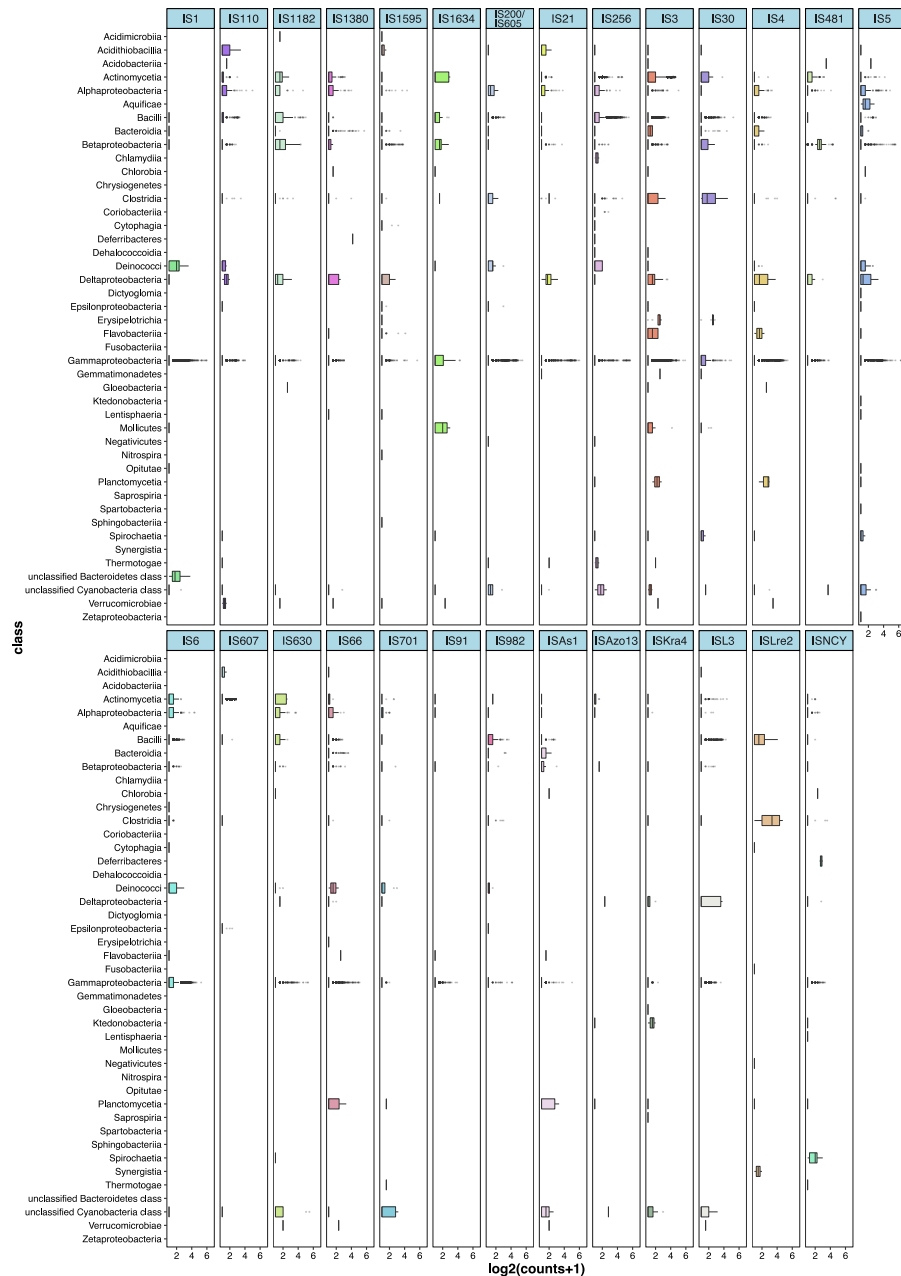

**Figure S16. Distribution of different IS family counts among bacterial taxonomic groups.** The boxplot diagram shows the counts per genome of each IS family across various bacterial genomes at the class level. The counts were log-transformed ( $\log_2(x+1)$ ) for enhanced resolution, and only non-zero counts were plotted. The boxplots show medians (midlines), interquartile ranges (boxes) and ranges (whiskers). As the figure includes multiple boxplots, the number of genomes analyzed in each individual boxplot is provided in Supplementary Data 3.

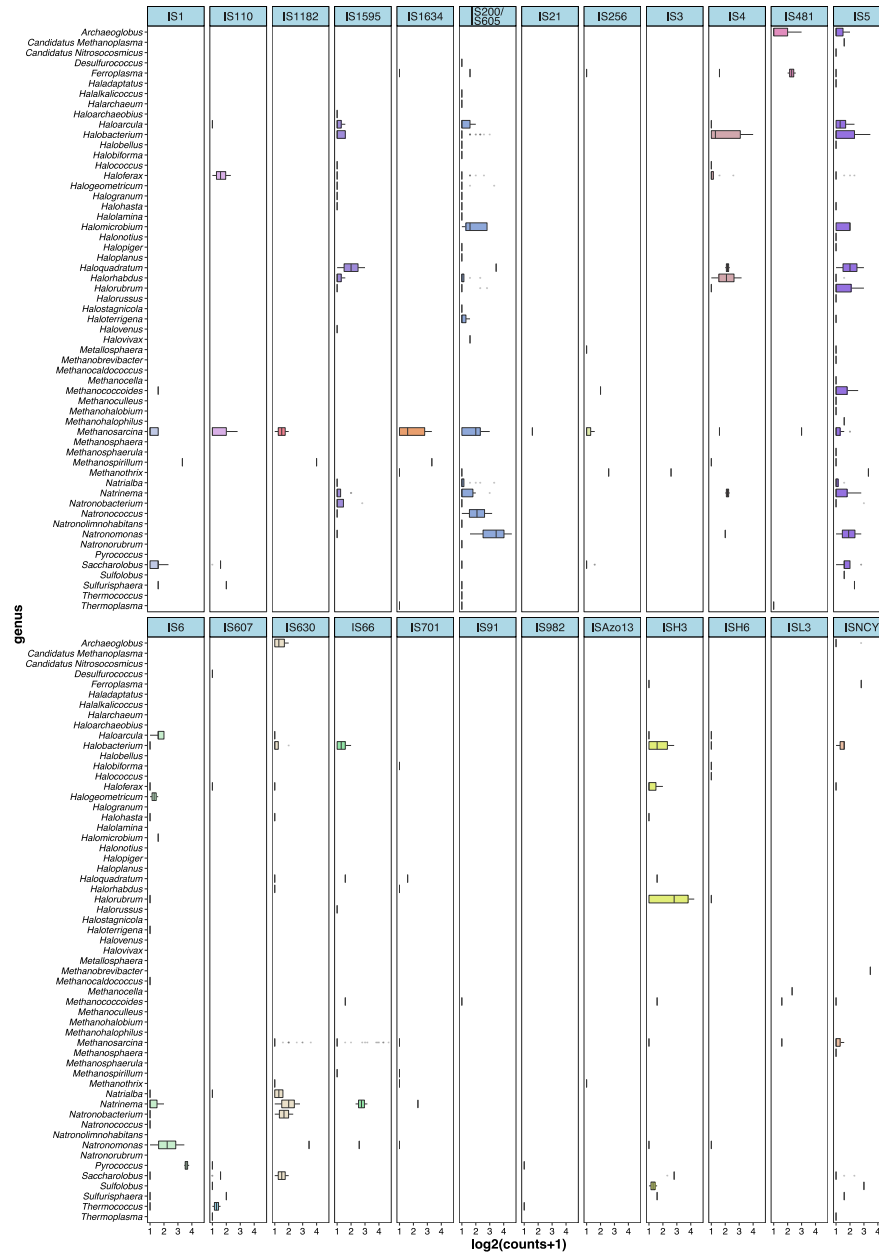

**Figure S17. Distribution of different IS family counts among archaeal taxonomic groups.** The boxplot diagram shows the counts per genome of each IS family across various archaeal genomes at the genus level. The count distributions were plotted on a  $\log_2(x+1)$  scale ( $x$ -axis) for better data visualization, and only non-zero values were plotted. The boxplots show medians (midlines), interquartile ranges (boxes) and ranges (whiskers). As the figure includes multiple boxplots, the number of genomes analyzed in each individual boxplot is provided in Supplementary Data 4.

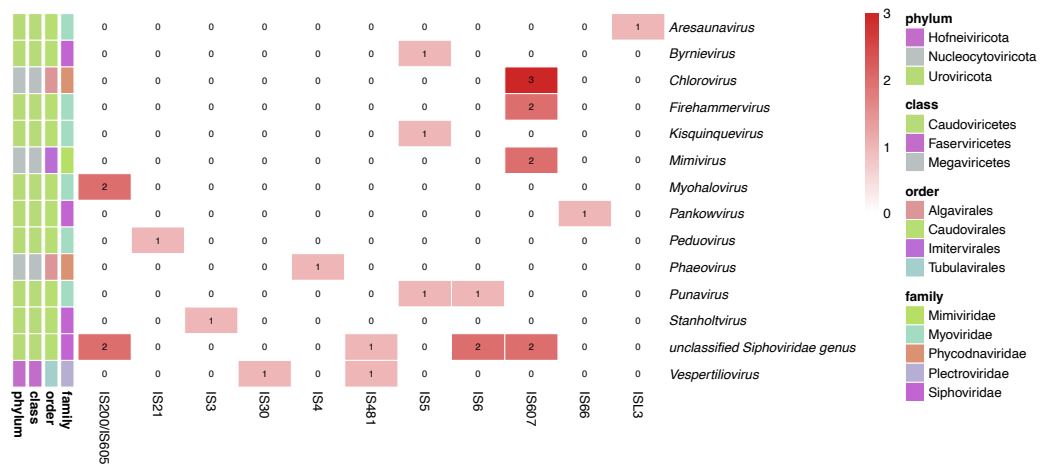

**Figure S18. Diversity distribution of different IS families across viral taxonomic groups.** The number of genomes per genus containing a specific IS family is indicated by a color gradient, and the numbers in boxes represent the actual values.

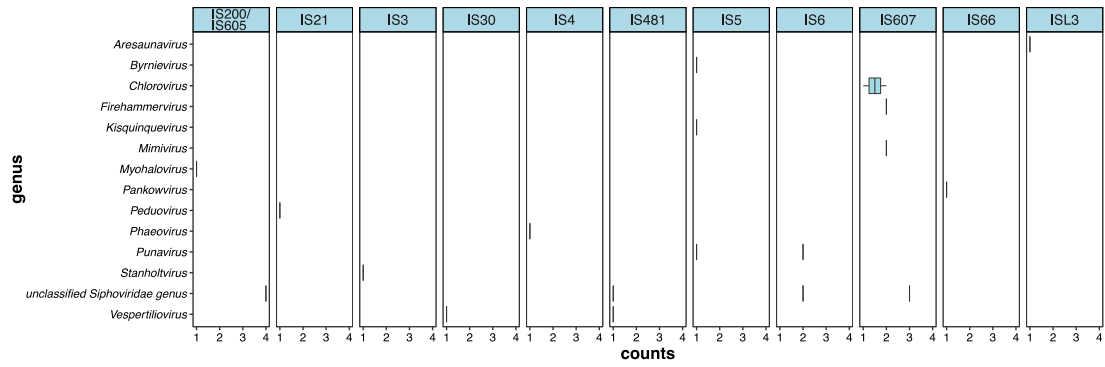

**Figure S19. Distribution of different IS family counts among viral taxonomic groups.** The boxplot diagram shows the counts per genome of each IS family across the various viral genomes at the genus level, and the horizontal coordinates represent the actual numbers. Only non-zero observations are shown. The boxplots show medians (midlines), interquartile ranges (boxes) and ranges (whiskers). As the figure includes multiple boxplots, the number of genomes analyzed in each individual boxplot is provided in Supplementary Data 5.

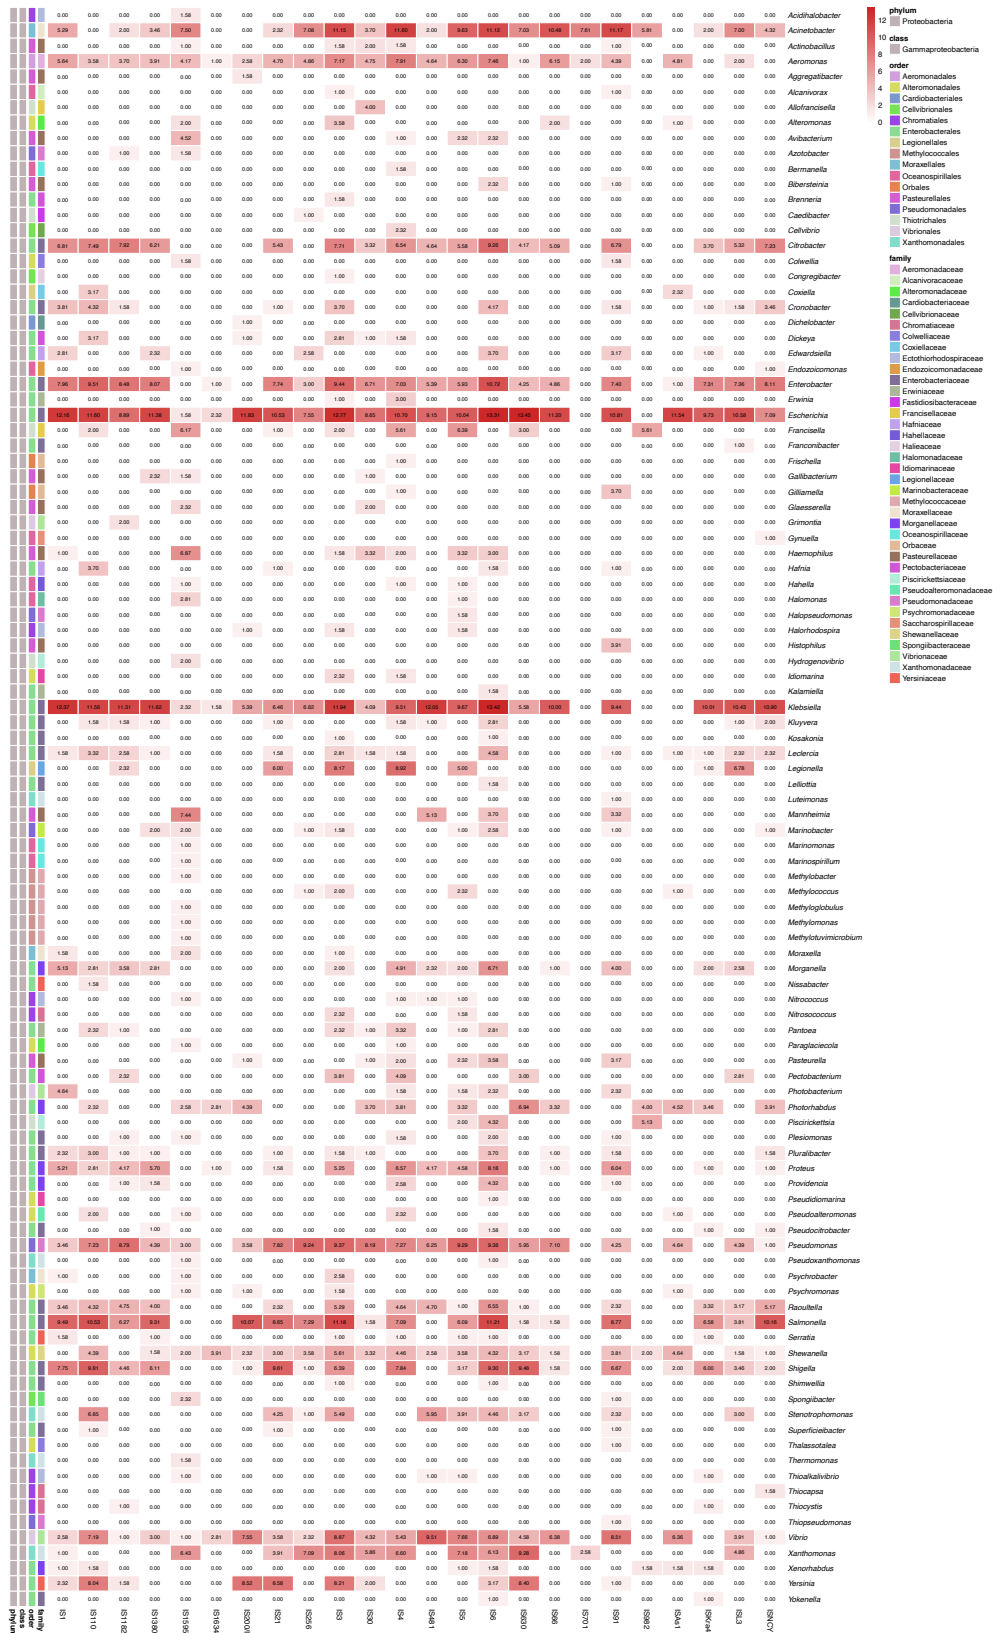

**Figure S20. Diversity distribution of different IS families within the class Gammaproteobacteria. Heatmap analysis of the diversity distribution of different IS**

families within the class Gammaproteobacteria at the genus level. The color gradient indicates the number of genomes per genus that contained the given IS family. The values in boxes were log-transformed ( $\log_2(x+1)$ ) for greater clarity.



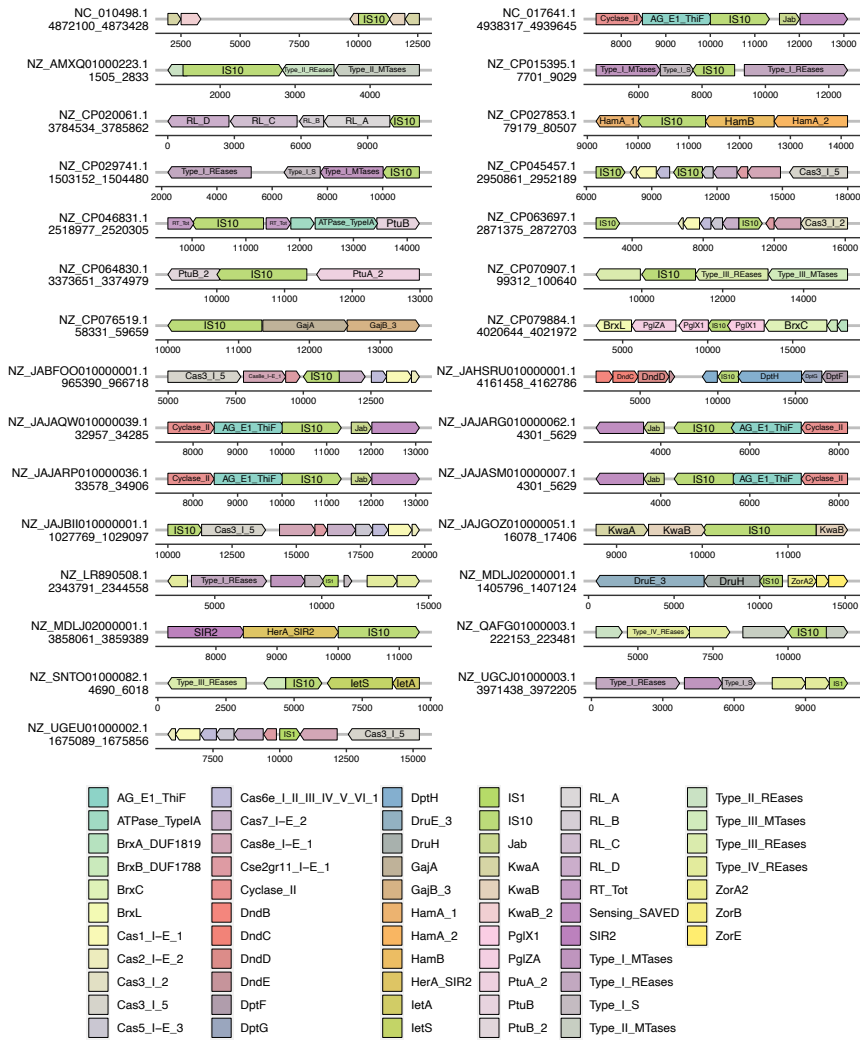

**Figure S22. Schematic diagram of compromised defense systems resulting from naturally occurring transpositions of IS1 and IS10. All identified transposition events are shown.**



## Supplementary Tables

**Table S1. Primers used in this study.**

| <b>Assembly cloning of the type I-E CRISPR-Cas system of <i>Erwinia amylovora</i> 7-3</b> |                                                                        |
|-------------------------------------------------------------------------------------------|------------------------------------------------------------------------|
| EraCas-locus234-2-F                                                                       | AGATCTCAGGCAGACTGCCG                                                   |
| EraCas-locus234-2-R                                                                       | CTGCGCGTCAGACGGCATCC                                                   |
| EraCas-locus234-3-F                                                                       | CTGCCTGTTACAAACGCTGT                                                   |
| EraCas-locus234-3-R                                                                       | AGGTGGGCGGCAATAGTGAG                                                   |
| EraCas-locus234-4-F                                                                       | GTGCAAGCCGTGAGCAGGCG                                                   |
| EraCas-locus234-4-R                                                                       | AAGCTTGCCAGTATTCTTC                                                    |
| T-Apr-IS10-Era-1-F                                                                        | ATTATCAGCAGCACCTTGGGGAATCAAGCATGCGCACCCTGA<br>GAGATCCCCTCATAAT         |
| T-Apr-IS10-Era-1-R                                                                        | TTATCATCCCCTTTTGCTGATCATGACCAATTTCTAGCCG                               |
| T-Apr-IS10-Era-2-F                                                                        | CGGCTAGAAATTGGTCATGATCAGCAAAGGGGATGATAA                                |
| T-Apr-IS10-Era-2-R                                                                        | GAGCAATGTTCAAAGAAAGCTCATGAGCTCAGCCAATCGA                               |
| T-Apr-IS10-Era-3-F                                                                        | TCGATTGGCTGAGCTCATGAGCTTTCTTTGAACATTGCTC                               |
| T-Apr-IS10-Era-3-R                                                                        | GACGGGCATGAACCACATTACGCAGATCCGCCAGATGGATGG<br>TGCGCACTGATGAATCCCCTAATG |
| T-Apr-pBAD-1-F                                                                            | CCGTCTGATAATGGAATATAACGGTCGTAAAGGGAGCTTCTCG<br>TTCTCCGCTCATGAGC        |
| T-Apr-pBAD-1-R                                                                            | CGTCATGTCTAGACGATCGTCAGCAAAGGGGATGATAA                                 |
| T-Apr-pBAD-2-F                                                                            | TTATCATCCCCTTTTGCTGACGATCGTCTAGACATGAGCG                               |
| T-Apr-pBAD-2-R                                                                            | CTTACCCCAATAGCGGTAATACTCAGGCTGCGAATTCATTTTTT<br>ATAACCTCCTTAGAG        |
| T-EraP-pro-Ichl-F                                                                         | AGGGCCGCAGATGCGACCCTTGTGTATCAAACAAGACGAACG<br>CACCGGTGCAGCCTTTT        |
| T-EraP-pro-Ichl-R                                                                         | ATTGACTATCCGGTATTACCCGGCATGACAGGAGTAAAACGCG<br>CGCGCAATTGAAAAAT        |
| <b>RT-qPCR analysis</b>                                                                   |                                                                        |
| qPCR-Eracas3-1-F                                                                          | GCGGCTATATCTACGGCAACAC                                                 |
| qPCR-Eracas3-1-R                                                                          | GGTTCTGCATCATCGGCTTCG                                                  |
| qPCR-Eracse1-2-F                                                                          | AGCTGCTGATCTGCCTGTTACA                                                 |
| qPCR-Eracse1-2-R                                                                          | GCTGCTGCGGATGGTTGAGA                                                   |
| qPCR-Eracse2-3-F                                                                          | GCCTAGCGAAGATAAGCAGCAA                                                 |
| qPCR-Eracse2-3-R                                                                          | CACCTCGGGTTCGGCATGAATA                                                 |
| qPCR-Eracas7-4-F                                                                          | CTGATGAGCGAGGTGGGTAACG                                                 |
| qPCR-Eracas7-4-R                                                                          | AGAACTCCTGGGTGCCAAGATG                                                 |
| qPCR-Eracas5-5-F                                                                          | GCAGCATCAGGCGGAACATG                                                   |
| qPCR-Eracas5-5-R                                                                          | AACTGGCGTGGTAGGTGGATT                                                  |
| qPCR-Eracas6-6-F                                                                          | AAGCAGGCGGTGGCAGGAAA                                                   |
| qPCR-Eracas6-6-R                                                                          | AGGCACGGGCGATGGATAACA                                                  |
| qPCR-Eracas1-7-F                                                                          | AATGGCGTGGGCGTCGTTAC                                                   |
| qPCR-Eracas1-7-R                                                                          | GCGGCTTGCCACTGTGAACA                                                   |

|                  |                        |
|------------------|------------------------|
| qPCR-Eracas2-8-F | ATGGCTGCTGGAAGTGCGTG   |
| qPCR-Eracas2-8-R | AAACCCGACTCGCTGTTAGTGG |
| 16sRNA-F         | ACCCTTATCCTTTGTTGCC    |
| 16sRNA-R         | TATGAGGTCCGCTTGCTCT    |

---

### Construction of the strain ActSY01

---

|                        |                                                                   |
|------------------------|-------------------------------------------------------------------|
| T-Pcas3-aprpBAD-F      | TTTGGCTTAAAAAGGGAATGTGGGTTACACGAAGGGTAACTCG<br>TTCTCCGCTCATGAGC   |
| T-Pcas3-aprpBAD-R      | TTTTCCCAGTAATGGCATATATATTTAAAAGGTTCCATTTTTT<br>ATAACCTCCTTAGAG    |
| T-Pcas-kan23119-1-F    | GAAGGGATGACCAGAGTCATCCCTGCAAATCCCAAATAAGGC<br>GTCCCGGAAAACGATTC   |
| T-Pcas-kan23119-1-R    | TAGTAGCTAGCATTATACCTAGGACTGAGCTAGCTGTCAACAC<br>GCTGCCGCAAGCACTCA  |
| T-Pcas-kan23119-2-F    | AGGTATAATGCTAGCTACTAGAGAAAGAGGGAGAAATACTAGA<br>TGAATTTGCTTATTGATA |
| T-Pcas-kan23119-2-R    | CCAACAGTTTTTCCATTGGA                                              |
| T-Pcas-kan23119-2-II-R | CGGGCGTACAGGGATCCAGT                                              |

---

### Constructions of the *recA*-deficient knock-out mutants

---

|                            |                                                                 |
|----------------------------|-----------------------------------------------------------------|
| $\Delta$ recA-FRT-MG1655-F | GACTATCCGGTATTACCCGGCATGACAGGAGTAAAAATGATTC<br>CGGGGATCCGTCGACC |
| $\Delta$ recA-FRT-MG1655-R | GCCGCAGATGCGACCCTTGTGTATCAAACAAGACGATTATGTA<br>GGCTGGAGCTGCTTC  |
| $\Delta$ recA-FRT-MDS42-F  | ATGGCTATCGACGAAAACAAACAGAAAGCGTTGGCGGCAATT<br>CCGGGGATCCGTCGACC |
| $\Delta$ recA-FRT-MDS42-R  | TTAAAAATCTTCGTTAGTTTCTGCTACGCCTTCGCTATCTGTAG<br>GCTGGAGCTGCTTC  |

---

### Constructions of CRISPR interference plasmids in the ISs trapping system

---

|                  |                                                                        |
|------------------|------------------------------------------------------------------------|
| Tar-tet-F        | ATCAGGTTTGTGCCAATACCAGTAGAAACAGACGAAGAATTG<br>GCCAGAAAAAAAAGAATATATAAG |
| Tar-tet-R        | GCGCAACGCAATTAATGTAAGTTAGCGCGAATTGATCTGGTGG<br>CCACGCCGGCTTCCATTCAGGTC |
| Tar-SmR-pTrc-1-F | GCACCCTCGCAAGCTCGGTTGCGGCCGCAATCGGGCAAATCTC<br>GAGTTCATGTGCAGCTCCATAA  |
| Tar-SmR-pTrc-1-R | TAATTGTCAACAGCTCATTTAGATCTCTCGAGACTGGCGAGCG<br>GCATCTTAT               |
| Tar-SmR-pTrc-2-F | ATAAGATGCCGCTCGCCAGTCTCGAGAGATCTAAATGAGCTGT<br>TGACAATTA               |
| Tar-SmR-pTrc-2-R | TTGTGCCGATATCTAAGCCTATTGAGTATTTCTTATCCATAGAT<br>CCTTTCTCCTCTTTGC       |
| SpCas9-HF1-1-F   | TTCGAATTCCTTATTATGTT                                                   |
| SpCas9-HF1-1-R   | GAAGATTTTTATCAAACGCTGTCATGCGTTCAATA                                    |
| SpCas9-HF1-2-F   | TATTGAACGCATGACAGCGTTTGATAAAAAATCTTC                                   |
| SpCas9-HF1-2-R   | TCAATTTTCGAGACAACGCTCCCAACCAGTATAA                                     |
| SpCas9-HF1-3-F   | TTATACTGGTTGGGGAGCGTTGTCTCGAAAATTGA                                    |

|                                      |                                                                          |
|--------------------------------------|--------------------------------------------------------------------------|
| SpCas9-HF1-3-R                       | TATCATCATGGATCAGCGCCATAAAAATTGCGATTG                                     |
| SpCas9-HF1-4-F                       | CAATCGCAATTTTATGGCGCTGATCCATGATGATA                                      |
| SpCas9-HF1-4-R                       | CCACATGCTTAGTGATCGCGCGAGTTTCAACCAAT                                      |
| SpCas9-HF1-5-F                       | ATTGGTTGAAACTCGCGCGATCACTAAGCATGTGG                                      |
| SpCas9-HF1-5-R                       | TCTAGACGATCGTTAAGCAGCCAGAGCGTAGTTTTCGTCGTTA<br>GCAGCGTCACCTCCTAGCTGACT   |
| Tar- $\Delta\lambda$ -red-kan-F      | TATGAAACACGCATTGATTTGAGTCAGCTAGGAGGTGACTAAG<br>GCGTCCCGGAAAACGATTC       |
| Tar- $\Delta\lambda$ -red-kan-R      | TTGCGCCTACCCGGATATTATCGTGAGGATGCGTACGTACACG<br>CTGCCGCAAGCACTCA          |
| Tar- $\Delta\lambda$ -red-kan-ssrA-F | GCGCACATTTCCCCGAAAAGTGCCACCTGCATCGATTTAGGCG<br>TCCCGGAAAACGATTC          |
| Tar- $\Delta\lambda$ -red-kan-ssrA-R | TTGCGCCTACCCGGATATTATCGTGAGGATGCGTACGTACACG<br>CTGCCGCAAGCACTCA          |
| Tar-spe-FnCpf1-1-F                   | AGCGCAATGACATTCTTGACAGGTATCTTCGAGCCAGCCACGAT<br>CGACATTGATCTGGCT         |
| Tar-spe-FnCpf1-1-R                   | AATTCTTGATAAATTGACATAGATCCTTTCTCCTCTTTGC                                 |
| Tar-spe-FnCpf1-2-F                   | GCAAAGAGGAGAAAGGATCTATGTCAATTTATCAAGAATT                                 |
| Tar-spe-FnCpf1-2-R                   | TTCTAAATACATTCAAATATGTATCCGCTCATGTCTAGACGATC<br>GTTAGTTATTCCTAT          |
| Tar-spe-SpCas9-HF1(D10A)-1-F         | CAGCGCAATGACATTCTTGC                                                     |
| Tar-spe-SpCas9-HF1(D10A)-1-R         | CTATTTGTGCCGATAGCTAAGCCTATTGAGT                                          |
| Tar-spe-SpCas9-HF1(D10A)-2-F         | ACTCAATAGGCTTAGCTATCGGCACAAATAG                                          |
| Tar-spe-SpCas9-HF1(D10A)-2-R         | CTGACCGCTTCCTCGTGCTT                                                     |
| Tar-spe-SpCas9-HF1(H840A)-1-F        | CAGCGCAATGACATTCTTGC                                                     |
| Tar-spe-SpCas9-HF1(H840A)-1-R        | CTTTGTGGAACAATGGCATCGACATCATAATC                                         |
| Tar-spe-SpCas9-HF1(H840A)-2-F        | GATTATGATGTCGATGCCATTGTTCCACAAAG                                         |
| Tar-spe-SpCas9-HF1(H840A)-2-R        | CTGACCGCTTCCTCGTGCTT                                                     |
| Tar-spe-F                            | CAGCGCAATGACATTCTTGC                                                     |
| Tar-spe-CasOP01-R                    | ATGCTATACTTTTTATCCATAGATCCTTTCTCCTCTTTGC                                 |
| Tar-spe-CasOP01-1-F                  | GCAAAGAGGAGAAAGGATCTATGGATAAAAAGTATAGCAT                                 |
| Tar-spe-CasOP01-1-R                  | CGGGTCATCCAGGCGAAGCGACTGTTCCCGCGAGCCAGAG                                 |
| Tar-spe-CasOP01-2-F                  | CTCTGGCTCGCGGGAACAGTCGCTTCGCCTGGATGACCCG                                 |
| Tar-spe-CasOP01-2-R                  | ATTGCACGGGTCTCTACCAGCTGACGTTTGATAAAAACCCG                                |
| Tar-spe-CasOP01-3-F                  | CGGGTTTTATCAAACGTCAGCTGGTAGAGACCCGTGCAAT                                 |
| Tar-spe-CasOP01-3-R                  | TTTCTAAATACATTCAAATATGTATCCGCTCATGTCTAGACGAT<br>CGTCAGTCTCCCCCAGCTGACTCA |
| Tar-spe-CasOP01-ssrA-3-R             | TTTCTAAATACATTCAAATATGTATCCGCTCATGTCTAGACGAT<br>CGTCAGGCGGCCAGGGCGTAGT   |
| Tar-spe-Cpf1OP01-R                   | AATTCCTGGTAAATCGACATAGATCCTTTCTCCTCTTTGC                                 |
| Tar-spe-FnCpf1OP01-1-F               | GCAAAGAGGAGAAAGGATCTATGTGATTTACCAGGAATT                                  |
| Tar-spe-FnCpf1OP01-1-R               | TCAGTTCCTGTTCTTTTTTCGAAGGATTATCGAGATTTTT                                 |
| Tar-spe-FnCpf1OP01-2-F               | AAAAATCTCGATAATCCTTCGAAAAAAGAACAGGAAGTGA                                 |
| Tar-spe-FnCpf1OP01-2-R               | CGTAAAGCGCTTATCCTTGATCAGATCATATTCAAACACG                                 |

|                        |                                                                        |
|------------------------|------------------------------------------------------------------------|
| Tar-spe-FnCpf1OP01-3-F | CGTGTTTGAATATGATCTGATCAAGGATAAGCGCTTTACG                               |
| Tar-spe-FnCpf1OP01-3-R | TTTCTAAATACATTCAAATATGTATCCGCTCATGTCTAGACGAT<br>CGTCAATTATTACGGTTCTGGA |
| Tar-spe-CasOP02-1-R    | GCCACCATCGATGTAGCCCGCATATCCGTTTTTTGACTG                                |
| Tar-spe-CasOP02-2-F    | CAGTCAAAAAACGGATATGCGGGCTACATCGATGGTGGC                                |
| Tar-spe-CasOP02-2-R    | TTTACGGGTCATCCAGGCAAACCTACTGTTCCCGCGAGC                                |
| Tar-spe-CasOP02-3-F    | GCTCGCGGGAACAGTAGGTTTGCCTGGATGACCCGTAAA                                |
| Tar-spe-CasOP02-3-R    | TCGTATCGGTTTGTCCCGGTGTTTATTATACGCTGAAAGCAC                             |
| Tar-spe-CasOP02-4-F    | GTGCTTTCAGCGTATAATAAACACCCGGGACAAACCGATACGA                            |
| Tar-spe-III-R          | GTGGCACTTTTCGGGGAAAT                                                   |
| Tar-spe-FnCpf1OP02-1-R | ATTACGGATGCGCAGAATGTCTTCAGACGGA                                        |
| Tar-spe-FnCpf1OP02-2-F | TCCGTCTGAAGACATTCTGCGCATCCGTAAT                                        |
| Tar-spe-CasOP03-1-R    | CGACTCTTCCAGGCGGTGAAAAAAGCTATCATCTACCTTCGC                             |
| Tar-spe-CasOP03-2-F    | TTCACCGCCTGGAAGAGTCGTTTCTGGTTGAAGAGGATAAAAA<br>ACACGAACGCCAT           |
| Tar-spe-CasOP03-2-R    | GTATTTCTCATGGTACGCCACCTCGTCCACTATATTA                                  |
| Tar-spe-CasOP03-3-F    | TAATATAGTGGACGAGGTGGCGTACCATGAGAAATAC                                  |
| Tar-spe-CasOP03-3-R    | GATTGATCCATTATCGAATGTTTCGCTGTTTACGCAGC                                 |
| Tar-spe-CasOP03-4-F    | GCTGCGTAAACAGCGAACATTTCGATAATGGATCAATC                                 |
| Tar-spe-CasOP03-4-R    | GTGTTCTTTCAGAATTTGGCTCCCCAGTTCT                                        |
| Tar-spe-CasOP03-5-F    | AGAACTGGGGAGCCAAATTCTGAAAGAACAC                                        |
| Tar-spe-FnCpf1OP03-1-R | AAAGAGATACAATTTACCTTGGTTCACCACC                                        |
| Tar-spe-FnCpf1OP03-2-F | GGTGGTGAACCAAGGTAAATTGTATCTCTTT                                        |
| Tar-spe-FnCpf1OP03-2-R | TGCCTTTTCTTTCAGTAAGAGGTTGATTTTCATC                                     |
| Tar-spe-FnCpf1OP03-3-F | GATGAAATCAACCTCTTACTGAAAGAAAAGGCA                                      |

---

#### Constructions of NHEJ expression plasmids

---

|                |                                          |
|----------------|------------------------------------------|
| pBAD-Mm-ku-1-F | GCGGCCCGCCGATCGTCTAGACATGAGCG            |
| pBAD-Mm-ku-1-R | CCCTTCCAGATGGAGCGCATTTTTTATAACCTCCTTAGAG |
| pBAD-Mm-ku-2-F | CTCTAAGGAGGTTATAAAAAATGCGCTCCATCTGGAAGGG |
| pBAD-Mm-ku-2-R | ACTAGTTGCTTGGATTCTCACCAATA               |
| pBAD-Ms-ku-1-F | ACATGTCGATCGTCTAGACATGAGCG               |
| pBAD-Ms-ku-1-R | CCCTTCCAGATGGATCGCATTTTTTATAACCTCCTTAGAG |
| pBAD-Ms-ku-2-F | CTCTAAGGAGGTTATAAAAAATGCGATCCATCTGGAAGGG |
| pBAD-Ms-ku-2-R | ACTAGTTGCTTGGATTCTCACCAATA               |
| pBAD-Bs-ku-1-F | GCGGCCCGCCGATCGTCTAGACATGAGCG            |
| pBAD-Bs-ku-1-R | AGAGAAGGAGTACGATTCATTTTTTATAACCTCCTTAGAG |
| pBAD-Bs-ku-2-F | CTCTAAGGAGGTTATAAAAAATGAATCGTACTCCTTCTCT |
| pBAD-Bs-ku-2-R | ACTAGTTGCTTGGATTCTCACCAATA               |

---

#### Determination of the indel mutations in the gene *ompF*

---

|          |                       |
|----------|-----------------------|
| V-ompF-F | GTGCGAGCACGTTTGTTCATT |
| V-ompF-R | CTTCGTTGGTCGTGTTGGCG  |

---

#### Detection of the target site duplications

---

|           |                      |
|-----------|----------------------|
| S-IS1-1-F | CGCCATTCATGGCCATATCA |
|-----------|----------------------|

|             |                      |
|-------------|----------------------|
| S-IS1-2-F   | CCTGAAGGGAAAGCTGCACG |
| S-IS2-1-F   | CCTGTATGTGCCCGTTTCGA |
| S-IS2-2-F   | CCGGAGAGTAACGGAATAGC |
| S-IS3-1-F   | CCGATGCGTTCAGCAAGCTT |
| S-IS3-2-F   | GAACACTTTATCAGCCGGGA |
| S-IS5-1-F   | GTACCAATGCTGCATGCAGT |
| S-IS5-2-F   | ATACGTCAGTGGGAGAGATC |
| S-IS10-1-F  | TTGGTTGGCAGGTTACGGCC |
| S-IS10-2-F  | GCTCAGAAACAAGGTTGGGA |
| S-IS150-1-F | GAGCGCGCGTAAACCAGCTT |
| S-IS150-2-F | CTGTTCTGCACTCTGACCAG |

---

**PCR amplifications of the complete coding regions of SpCas9-HF1, FnCpf1 and their derivatives**

---

|                |                      |
|----------------|----------------------|
| S-univer-c&9-F | TAAGATGCCGCTCGCCAGTC |
| S-univer-c&9-R | CTGACCGCTTCCTCGTGCTT |

---

**Sanger sequencing for the complete coding regions of SpCas9-HF1, FnCpf1 and their derivatives**

---

|                       |                       |
|-----------------------|-----------------------|
| S-SpCas9-HF1-1M-F     | GCTGGTTTTTCGCATTCTTC  |
| S-SpCas9-HF1-2-F      | CAAATTCCTTGGGTGAGCT   |
| S-SpCas9-HF1-3-F      | CGCCAAGTTAATCACTCAAC  |
| S-SpCas9-HF1-4-F      | GGTAATCACTTTAACCTCTC  |
| S-FnCpf1-1-F          | CCCACAGGGTAAAACACTTG  |
| S-FnCpf1-2-F          | GGCAGAAGAGCTAACCTTTG  |
| S-FnCpf1-3-F          | GCAAACCTTTCGGCTATTCC  |
| S-FnCpf1-4-F          | TAAGCATCCGGAGTGGAAG   |
| S-FnCpf1-5-F          | CTCAAATAGCCCTTATCAAGG |
| S-SpCas9-HF1-OP01-1-F | CTTTTCATCCAGCTGGTGCA  |
| S-SpCas9-HF1-OP01-2-F | CCGCACCAGATTCCTTGGG   |
| S-SpCas9-HF1-OP01-3-F | GTACGCCCATCTGTTTGATG  |
| S-SpCas9-HF1-OP01-4-F | CCCGCAGTGACAAAAACCGT  |
| S-SpCas9-HF1-OP01-5-F | TGTGGGATAAAGGTCGGGAC  |
| S-FnCpf1-OP01-1-F     | GCAGCAATGATATTCCGACC  |
| S-FnCpf1-OP01-2-F     | CCGCGGTGTTGGAATACATT  |
| S-FnCpf1-OP01-3-F     | CGGCGTTATGAACAAGAAAA  |
| S-FnCpf1-OP01-4-F     | CCCGAAAAAGGAAAGCGTGT  |

---

**Sanger sequencing for the sgRNAs and crRNAs expression cassettes**

---

|                    |                       |
|--------------------|-----------------------|
| V-p15A-cm-circle-F | CAAGGCGACAAGGTGCTGAT  |
| V-p15A-cm-circle-R | GGTAGCTCAGAGAACCTTCGA |

---

**Table S2. Plasmids used in this study.**

| <b>Plasmids</b>                                                                                    | <b>Descriptions</b>                                                                                                                                                                                 | <b>Source</b>                                 |
|----------------------------------------------------------------------------------------------------|-----------------------------------------------------------------------------------------------------------------------------------------------------------------------------------------------------|-----------------------------------------------|
| <b>General plasmids</b>                                                                            |                                                                                                                                                                                                     |                                               |
| pBluescript SK(+)                                                                                  | the vector backbone for cloning PCR products                                                                                                                                                        | Stratagene                                    |
| p15A-cm                                                                                            | the vector backbone for cloning both sgRNAs and crRNAs expression cassettes                                                                                                                         | 1                                             |
| pUC57-1.8K                                                                                         | the vector backbone for cloning NHEJ expression cassettes                                                                                                                                           | Qingke <sup>a</sup> ,<br>General <sup>b</sup> |
| pClone007                                                                                          | the vector backbone for cloning the type I-E CRISPR Cas system of <i>Erwinia amylovora</i> 7-3                                                                                                      | Qingke <sup>a</sup>                           |
| pSET152                                                                                            | the template plasmid for amplifying the apramycin selective marker                                                                                                                                  | 2                                             |
| <b>the plasmids associated with the type I-E CRISPR-Cas system of <i>Erwinia amylovora</i> 7-3</b> |                                                                                                                                                                                                     |                                               |
| pClone007-EraCas01                                                                                 | the plasmid pClone007 containing the fragment EraCas01                                                                                                                                              | This study                                    |
| pClone007-EraCas02                                                                                 | the plasmid pClone007 containing the fragment EraCas02                                                                                                                                              | This study                                    |
| pClone007-EraCas03                                                                                 | the plasmid pClone007 containing the fragment EraCas03                                                                                                                                              | This study                                    |
| pClone007-EraCas04                                                                                 | the plasmid pClone007 containing the fragment EraCas04                                                                                                                                              | This study                                    |
| pClone007-EraCas05                                                                                 | the plasmid pClone007 containing the fragment EraCas05                                                                                                                                              | This study                                    |
| pEraCas234                                                                                         | the plasmid pClone007 containing the fragment EraCas02, EraCas03 and EraCas04                                                                                                                       | This study                                    |
| pEraCas1234                                                                                        | the plasmid pClone007 containing the fragment EraCas01, EraCas02, EraCas03 and EraCas04                                                                                                             | This study                                    |
| pEraCas                                                                                            | the plasmid pClone007 containing the engineered type I-E CRISPR-Cas locus of <i>E. amylovora</i> 7-3                                                                                                | This study                                    |
| pEraCas-IS10-Apr                                                                                   | derived from the plasmid pEraCas, in which the IS10 element together with the apramycin resistance marker were inserted into the coding region of <i>cas7</i>                                       | This study                                    |
| pEraCas-IS10                                                                                       | derived from the plasmid pEraCas-IS10-Apr, in which the apramycin resistance marker was removed                                                                                                     | This study                                    |
| p15A-Eraprotos                                                                                     | the plasmid p15A-cm containing the engineered protospacers that were designed from the plasmid p7-3                                                                                                 | This study                                    |
| SK(+)-spe                                                                                          | the plasmid pBluescript SK(+) containing the spectinomycin resistance cassette                                                                                                                      | This study                                    |
| p15A-Eraprotos-spe                                                                                 | the plasmid p15A-Eraprotos with the insertion of the spectinomycin resistance cassette                                                                                                              | This study                                    |
| p15A-spe                                                                                           | derived from the plasmid p15A-Eraprotos-spe, in which all protospacers were deleted                                                                                                                 | This study                                    |
| pEraCas-pBAD                                                                                       | derived from the plasmid pEraCas, in which the <i>araC</i> gene and pBAD promoter were inserted in front of <i>cas3</i> to drive the expression of <i>cas</i> operon in the presence of L-arabinose | This study                                    |

**the plasmids associated with the type I-E CRISPR/Cas system of *E. coli* DH10B and ActSY01**

|                                                                |                                                                                                                                                                                                                              |                 |
|----------------------------------------------------------------|------------------------------------------------------------------------------------------------------------------------------------------------------------------------------------------------------------------------------|-----------------|
| p15A-sgRNA::lacZ02                                             | the sgRNA::lacZ02 expression cassette was cloned into plasmid p15A-cm                                                                                                                                                        | This study      |
| p15A-CRISPR::arpA                                              | the CRISPR array expression cassette (CRISPR::arpA) was cloned into plasmid p15A-cm                                                                                                                                          | This study      |
| p15A-CRISPR::ftsA                                              | the CRISPR array expression cassette (CRISPR::ftsA) was cloned into plasmid p15A-cm                                                                                                                                          | This study      |
| <b>CRISPR interference plasmids in the ISs trapping system</b> |                                                                                                                                                                                                                              |                 |
| pCas                                                           | the original vector backbone for the constructions of the CRISPR interference plasmids                                                                                                                                       | Addgene # 62225 |
| pY001                                                          | the template plasmid containing the complete coding region of FnCpf1                                                                                                                                                         | Addgene # 69973 |
| pCas-tet                                                       | pCas with the insertion of tetracycline resistance marker                                                                                                                                                                    | This study      |
| pCasY-1                                                        | derived from the plasmid pCas-tet, in which kanamycin resistance marker together with its neighboring sequences were substituted with both spectinomycin resistance marker and pTrc promoter                                 | This study      |
| pCasY-2                                                        | derived from the plasmid pCasY-1, in which the complete coding region of SpCas9 was replaced with the high-fidelity SpCas9-HF1 nuclease fused with the ssrA degradation tag to its C-terminus                                | This study      |
| pCasY-3-ΔSIM-kan                                               | derived from the plasmid pCasY-2, in which the λ-red expression cassette together with the ssrA degradation tag were substituted with the kanamycin resistance marker                                                        | This study      |
| pCasY-3-ΔSIM-kan (D10A)                                        | pCasY-3-ΔSIM-kan with the mutation D10A in the coding region of the SpCas9-HF1                                                                                                                                               | This study      |
| pCasY-3-ΔSIM-kan (H840A)                                       | pCasY-3-ΔSIM-kan with the mutation H840A in the coding region of the SpCas9-HF1                                                                                                                                              | This study      |
| pCasY-3-ΔSIM-kan (D10A&H840A)                                  | pCasY-3-ΔSIM-kan with the mutations D10A and H840A in the coding region of the SpCas9-HF1                                                                                                                                    | This study      |
| pCasY-3-ΔSIM-kan-ssrA-PvuI                                     | the vector backbone derived from the plasmid pCasY-3-ΔSIM-kan-ssrA, in which both the partial C-terminus of spectinomycin resistance protein coding region and the complete SpCas9-HF1-ssrA expression cassette were deleted | This study      |
| pCasY-3-ΔSIM-kan-OP01                                          | the vector backbone pCasY-3-ΔSIM-kan-ssrA-PvuI with the insertions of both C-terminus of spectinomycin resistance protein coding region and the SpCas9-HF1-OP01 expression cassette                                          | This study      |
| pCasY-3-ΔSIM-kan-OP02                                          | the vector backbone pCasY-3-ΔSIM-kan-ssrA-PvuI with the insertions of both C-terminus of spectinomycin resistance protein coding region and the SpCas9-HF1-OP02 expression cassette                                          | This study      |

|                                          |                                                                                                                                                                                                   |            |
|------------------------------------------|---------------------------------------------------------------------------------------------------------------------------------------------------------------------------------------------------|------------|
| pCasY-3- $\Delta$ SIM-kan-OP03           | the vector backbone pCasY-3- $\Delta$ SIM-kan-ssrA-PvuI with the insertions of both C-terminus of spectinomycin resistance protein coding region and the SpCas9-HF1-OP03 expression cassette      | This study |
| pCasY-3- $\Delta$ SIM-kan-ssrA           | derived from the plasmid pCasY-2, in which the $\lambda$ -red expression cassette was substituted with the kanamycin resistance marker                                                            | This study |
| pCasY-3- $\Delta$ SIM-kan-OP01-ssrA      | the vector backbone pCasY-3- $\Delta$ SIM-kan-ssrA-PvuI with the insertions of both C-terminus of spectinomycin resistance protein coding region and the SpCas9-HF1-OP01-ssrA expression cassette | This study |
| pCasY-3- $\Delta$ SIM-kan-OP02-ssrA      | the vector backbone pCasY-3- $\Delta$ SIM-kan-ssrA-PvuI with the insertions of both C-terminus of spectinomycin resistance protein coding region and the SpCas9-HF1-OP02-ssrA expression cassette | This study |
| pCasY-3- $\Delta$ SIM-kan-OP03-ssrA      | the vector backbone pCasY-3- $\Delta$ SIM-kan-ssrA-PvuI with the insertions of both C-terminus of spectinomycin resistance protein coding region and the SpCas9-HF1-OP03-ssrA expression cassette | This study |
| pCpf1 Y-3- $\Delta$ SIM-kan              | the vector backbone pCasY-3- $\Delta$ SIM-kan-ssrA-PvuI with the insertions of both C-terminus of spectinomycin resistance protein coding region and the FnCpf1 expression cassette               | This study |
| pCpf1 Y-3- $\Delta$ SIM-kan-OP01         | the vector backbone pCasY-3- $\Delta$ SIM-kan-ssrA-PvuI with the insertions of both C-terminus of spectinomycin resistance protein coding region and the FnCpf1-OP01 expression cassette          | This study |
| pCpf1 Y-3- $\Delta$ SIM-kan-OP02         | the vector backbone pCasY-3- $\Delta$ SIM-kan-ssrA-PvuI with the insertions of both C-terminus of spectinomycin resistance protein coding region and the FnCpf1-OP02 expression cassette          | This study |
| pCpf1 Y-3- $\Delta$ SIM-kan-OP03         | the vector backbone pCasY-3- $\Delta$ SIM-kan-ssrA-PvuI with the insertions of both C-terminus of spectinomycin resistance protein coding region and the FnCpf1-OP03 expression cassette          | This study |
| <b>sgRNAs/crRNAs expression plasmids</b> |                                                                                                                                                                                                   |            |
| p15A-cm-sgRNA-nonespacer                 | the sgRNA cassette without any spacer sequence cloned into plasmid p15A-cm                                                                                                                        | This study |
| p15A-cm-sgRNA::ompF                      | the sgRNA::ompF expression cassette was cloned into plasmid p15A-cm                                                                                                                               | This study |
| p15A-cm-sgRNA::pyrF                      | the sgRNA::pyrF expression cassette was cloned into plasmid p15A-cm                                                                                                                               | This study |
| p15A-cm-sgRNA::lpp                       | the sgRNA::lpp expression cassette was cloned into plasmid p15A-cm                                                                                                                                | This study |



|                                     |                                                                                                                                                                                                                  |            |
|-------------------------------------|------------------------------------------------------------------------------------------------------------------------------------------------------------------------------------------------------------------|------------|
| p15A-cm-sgRNA:: <i>lacZ</i>         | the sgRNA:: <i>lacZ</i> expression cassette was cloned into plasmid p15A-cm                                                                                                                                      | This study |
| p15A-cm-sgRNA:: <i>ompF</i> pair 01 | the sgRNA:: <i>ompF</i> pair 01 expression cassette was cloned into plasmid p15A-cm                                                                                                                              | This study |
| p15A-cm-sgRNA:: <i>ompF</i> pair 02 | the sgRNA:: <i>ompF</i> pair 02 expression cassette was cloned into plasmid p15A-cm                                                                                                                              | This study |
| p15A-cm-crRNA-nonespacer            | the crRNA cassette without any spacer sequence cloned into plasmid p15A-cm                                                                                                                                       | This study |
| p15A-cm-crRNA:: <i>ompF</i>         | the crRNA:: <i>ompF</i> expression cassette was cloned into plasmid p15A-cm                                                                                                                                      | This study |
| p15A-cm-crRNA:: <i>pyrF</i>         | the crRNA:: <i>pyrF</i> expression cassette was cloned into plasmid p15A-cm                                                                                                                                      | This study |
| p15A-cm-crRNA:: <i>lpp</i>          | the crRNA:: <i>lpp</i> expression cassette was cloned into plasmid p15A-cm                                                                                                                                       | This study |
| p15A-cm-crRNA:: <i>lacZ</i>         | the crRNA:: <i>lacZ</i> expression cassette was cloned into plasmid p15A-cm                                                                                                                                      | This study |
| <b>NHEJ expression plasmids</b>     |                                                                                                                                                                                                                  |            |
| pUC57-1.8K-Bs-ku                    | the complete coding region of the Ku from the <i>Bacillus subtilis</i> 168 was cloned into the plasmid pUC57-1.8K                                                                                                | This study |
| SK(+)-pBAD-Bs-ku                    | the gene <i>ku</i> was amplified from the plasmid pUC57-1.8K-Bs-ku and fused together with the promoter pBAD by overlap PCR, subsequently, the overlap PCR product was cloned into the plasmid pBluescript SK(+) | This study |
| pUC57-1.8K-Bs-ligD                  | the gene <i>ligD</i> from the <i>Bacillus subtilis</i> 168, was assembled with the promoter J23119, and then cloned into the plasmid pUC57-1.8K                                                                  | This study |
| pUC57-1.8K-Ms-ku                    | the complete coding region of the Ku from the <i>Mycobacterium smegmatis</i> mc <sup>2</sup> 155 was cloned into the plasmid pUC57-1.8K                                                                          | This study |
| SK(+)-pBAD-Ms-ku                    | the gene <i>ku</i> was amplified from the plasmid pUC57-1.8K-Ms-ku and fused together with the promoter pBAD by overlap PCR, subsequently, the overlap PCR product was cloned into the plasmid pBluescript SK(+) | This study |
| pUC57-1.8K-Ms-ligD                  | the gene <i>ligD</i> from the <i>Mycobacterium smegmatis</i> mc <sup>2</sup> 155, was assembled with the promoter J23119, and then cloned into the plasmid pUC57-1.8K                                            | This study |
| pUC57-1.8K-Mm-ku                    | the complete coding region of the Ku from the <i>Mycobacterium marinum</i> M was cloned into the plasmid pUC57-1.8K                                                                                              | This study |

|                    |                                                                                                                                                                                                                  |            |
|--------------------|------------------------------------------------------------------------------------------------------------------------------------------------------------------------------------------------------------------|------------|
| SK(+)-pBAD-Mm-ku   | the gene <i>ku</i> was amplified from the plasmid pUC57-1.8K-Mm-ku and fused together with the promoter pBAD by overlap PCR, subsequently, the overlap PCR product was cloned into the plasmid pBluescript SK(+) | This study |
| pUC57-1.8K-Mm-ligD | the gene <i>ligD</i> from the <i>Mycobacterium marinum</i> M, was assembled with the promoter J23119, and then cloned into the plasmid pUC57-1.8K                                                                | This study |
| pBs-NHEJ           | the DNA cassette harboring the gene <i>ku</i> and pBAD promoter was digested from the plasmid SK(+)-pBAD-Bs-ku, and then cloned into the plasmid pUC57-1.8K-Bs-ligD                                              | This study |
| pMs-NHEJ           | the DNA cassette harboring the gene <i>ku</i> and pBAD promoter was digested from the plasmid SK(+)-pBAD-Ms-ku, and then cloned into the plasmid pUC57-1.8K-Ms-ligD                                              | This study |
| pMm-NHEJ           | the DNA cassette harboring the gene <i>ku</i> and pBAD promoter was digested from the plasmid SK(+)-pBAD-Mm-ku, and then cloned into the plasmid pUC57-1.8K-Mm-ligD                                              | This study |

<sup>a</sup> denoted the Beijing Qingke Biotechnology Co., Ltd.

<sup>b</sup> indicated the General Biological System (Anhui) Co., Ltd (Anhui, China).

**Table S3. Strains used in this study.**

| <b>Strains</b>               | <b>Descriptions</b>                                                                                                       | <b>Source</b> |
|------------------------------|---------------------------------------------------------------------------------------------------------------------------|---------------|
| <i>Escherichia coli</i>      |                                                                                                                           |               |
| DH10B                        | str. K-12 F <sup>-</sup>                                                                                                  | Invitrogen    |
| MG1655                       | K-12 F <sup>-</sup> $\lambda^-$ <i>ilvG^- rfb-50 rph-1</i>                                                                | <sup>3</sup>  |
| MG1655- $\Delta$ <i>recA</i> | MG1655 strain with <i>recA</i> gene disrupted                                                                             | This study    |
| MDS42                        | a derivative of <i>E. coli</i> K-12 without IS elements                                                                   | <sup>4</sup>  |
| MDS42- $\Delta$ <i>recA</i>  | MDS42 strain with <i>recA</i> gene disrupted                                                                              | This study    |
| GB08-red                     | for expression of $\lambda$ -red recombination system                                                                     | <sup>1</sup>  |
| SYHY01                       | DH10B equipped with an exogenous <i>E. amylovora</i> type I-E CRISPR-Cas system in a single plasmid pEraCas               | This study    |
| SYHY02                       | DH10B harboring an exogenous <i>E. amylovora</i> type I-E IS10-aborted CRISPR-Cas system in a single plasmid pEraCas-IS10 | This study    |
| SYHY01::p15A-Eraprotos-spe   | SYHY01 bearing plasmid p15A-Eraprotos-spe                                                                                 | This study    |
| SYHY02::p15A-Eraprotos-spe   | SYHY02 bearing plasmid p15A-Eraprotos-spe                                                                                 | This study    |
| SYHY01::p15A-spe             | SYHY01 bearing plasmid p15A-spe                                                                                           | This study    |
| SYHY02::p15A-spe             | SYHY02 bearing plasmid p15A-spe                                                                                           | This study    |
| SYHY03                       | DH10B containing all protospacers that were designed from plasmid p7-3                                                    | This study    |
| DH10B::pEraCas               | DH10B containing plasmid pEraCas                                                                                          | This study    |
| DH10B::pEraCas-pBAD          | DH10B containing plasmid pEraCas-pBAD                                                                                     | This study    |
| ActSY01                      | DH10B harboring an engineered type I-E CRISPR/Cas system                                                                  | This study    |

**Table S4. Analysis of a total of 19 larger amplicons containing an IS element insertion into *cas* genes within the type I-E CRISPR/Cas system of the strain ActSY01.**

| <b>Samples</b> | <b>IS type</b> | <b>TSD sequences</b> | <b>TSD length</b> |
|----------------|----------------|----------------------|-------------------|
| A01            | IS10           | CGCAGAACA            | 9                 |
| A02            | IS10           | TGCTATGCT            | 9                 |
| A03            | IS10           | TGTCAGGCA            | 9                 |
| A04            | IS10           | TGCTATGCT            | 9                 |
| A05            | IS5            | TTAG                 | 4                 |
| A06            | IS1            | ACGCCAGCG            | 9                 |
| A07            | IS1            | GGCAATGGC            | 9                 |
| A09            | IS2            | GGCAC                | 5                 |
| A10            | IS10           | TGCTATGCT            | 9                 |
| A11            | IS10           | GGCCTGGCT            | 9                 |
| A12            | IS10           | CACTCGACG            | 9                 |
| A13            | IS5            | TTAA                 | 4                 |
| A14            | IS10           | CACTCGACG            | 9                 |
| A16            | IS10           | TGCTGCGCA            | 9                 |
| A17            | IS10           | CACTCGACG            | 9                 |
| A18            | IS1            | CTGGTTTCC            | 9                 |
| A19            | IS10           | GGCCTGGCT            | 9                 |
| A20            | IS10           | AGCTTCGCC            | 9                 |
| A23            | IS10           | CGCAGAACA            | 9                 |

**Table S5. Analysis of a total of 44 larger amplicons containing an IS element insertion into the coding region of SpCas9-HF1.**

| <b>Samples</b> | <b>IS type</b> | <b>TSD sequences</b> | <b>TSD length</b> |
|----------------|----------------|----------------------|-------------------|
| 1108-02A1      | IS1            | GAGATGGCG            | 9                 |
| 1108-02A2      | IS1            | GATTTGCGC            | 9                 |
| 1108-02A3      | IS1            | GAGATGGCG            | 9                 |
| 1108-02A5      | IS5            | CAAG                 | 4                 |
| 1108-02B4      | IS1            | GTAACCGTT            | 9                 |
| 1110-03A1      | IS5            | CTAA                 | 4                 |
| 1110-03A2      | IS10           | TGCTAAGTC            | 9                 |
| 1110-03A3      | IS10           | TGCTAAGTC            | 9                 |
| 1110-03A4      | IS10           | CACTCAACG            | 9                 |
| 1110-03A5      | IS1            | GTGATTATG            | 9                 |
| 1110-03A6      | IS10           | TGCTAAGTC            | 9                 |
| 1110-03A7      | IS10           | CACTCAACG            | 9                 |
| 1110-03A8      | IS3            | GGT                  | 3                 |
| 1110-03B1      | IS10           | CACTCAACG            | 9                 |
| 1110-03B2      | IS10           | TGCTAAGTC            | 9                 |
| 1110-03B3      | IS10           | TGCTAAGTC            | 9                 |
| 1110-03B4      | IS10           | TGCCCAAG             | 9                 |
| 1110-03B5      | IS1            | AGTAACCGT            | 9                 |
| 1110-03B6      | IS10           | TGCTAAGTC            | 9                 |
| 1110-03B7      | IS10           | CACTCAACG            | 9                 |
| 1110-03B8      | IS10           | TGCTAAGTC            | 9                 |
| 1110-03C1      | IS1            | CAAGGTTT             | 8                 |
| 1110-03C2      | IS5            | TTAG                 | 4                 |
| 1110-03C3      | IS10           | TGCTAAGTC            | 9                 |
| 1110-03C5      | IS10           | CACTCAACG            | 9                 |
| 1110-03C6      | IS1            | CAAGGTTT             | 8                 |
| 1110-03C7      | IS10           | TGCTAAGTC            | 9                 |
| 1110-03C8      | IS10           | CGCATGACA            | 9                 |
| 1110-03D1      | IS10           | TGCTAAGTC            | 9                 |
| 1110-03D3      | IS3            | GGT                  | 3                 |
| 1110-03D4      | IS3            | GGT                  | 3                 |
| 1110-03D5      | IS10           | TGCTAAGTC            | 9                 |
| 1110-03D6      | IS10           | TGCTAAGTC            | 9                 |
| 1110-03D7      | IS1            | CAAGGTTT             | 8                 |
| 1110-03D8      | IS10           | CACTCAACG            | 9                 |
| 1110-03E4      | IS10           | CACTCAACG            | 9                 |
| 1110-03E5      | IS3            | GGT                  | 3                 |
| 1110-03E6      | IS10           | CACTCAACG            | 9                 |
| 1110-03E8      | IS1            | GTAACCGTT            | 9                 |

|           |      |           |   |
|-----------|------|-----------|---|
| 1110-03F1 | IS5  | CTAA      | 4 |
| 1110-03F2 | IS10 | AGCTCTATC | 9 |
| 1110-03F3 | IS10 | TGCTAAGTC | 9 |
| 1110-03F4 | IS10 | CACTCAACG | 9 |
| 1110-03F5 | IS10 | CACTCAACG | 9 |

---

**Table S6. Summary of whole-genome sequencing of 11 CRISPR-tolerant mutants and the control strain.**

| <b>Samples</b> | <b>Genome accession</b> | <b>IS type<sup>a</sup></b> |
|----------------|-------------------------|----------------------------|
| SY221          | CP106998                | /                          |
| SY22A1         | CP107005                | IS10                       |
| SY22A3         | CP107004                | IS1                        |
| SY22A4         | CP106999                | IS5                        |
| SY22A6         | CP106994                | IS1                        |
| SY22B1         | CP107003                | IS5                        |
| SY22B2         | CP107000                | /                          |
| SY22B3         | CP106995                | IS10                       |
| SY22B5         | CP107001                | IS2                        |
| SY22B6         | CP106997                | /                          |
| SY22C3         | CP107002                | IS2                        |
| SY22D8         | CP106996                | /                          |

<sup>a</sup> identified by PCR and Sanger sequencing.

“/” indicated that no IS element was inserted into the coding region of SpCas9-HF1 in the given sample.

**Table S7. The non-canonical length of TSD sequences generated by IS1 in our CRISPR/Cas-mediated ISs trapping system.**

| <b>Samples</b> | <b>TSD sequences</b>     | <b>TSD length</b> |
|----------------|--------------------------|-------------------|
| 0201-2F3       | ATCAAGACGAT              | 11                |
| 0310-3A3       | CAAATATAACAACAAGGACTTTTC | 23                |
| 0310-3D1       | CAAATATAACAACAAGGACTTTTC | 23                |
| 0310-3E6       | CAAATATAACAACAAGGACTTTTC | 23                |
| 0526-1B5       | GTTTTAT                  | 7                 |



## Supplementary References

1. Wang, H. *et al.* ExoCET: exonuclease in vitro assembly combined with RecET recombination for highly efficient direct DNA cloning from complex genomes. *Nucleic Acids Res* **46**, e28 (2018).
2. Bierman, M. *et al.* Plasmid cloning vectors for the conjugal transfer of DNA from *Escherichia coli* to *Streptomyces* spp. *Gene* **116**, 43-49 (1992).
3. Blattner, F.R. *et al.* The complete genome sequence of *Escherichia coli* K-12. *Science* **277**, 1453-1462 (1997).
4. Pósfai, G. *et al.* Emergent properties of reduced-genome *Escherichia coli*. *Science* **312**, 1044-1046 (2006).
