# Supplementary material for: Insertion sequence transposition inactivates CRISPR-Cas immunity
Source: PubMed Central journal article supplement (PMC10359306; doi:10.1038/s41467-023-39964-7), 2023-07-20
Supplement: 41467_2023_39964_MOESM3_ESM.pdf [file 41467_2023_39964_MOESM3_ESM.pdf]

## **Description of Additional Supplementary Files:**

**Supplementary Data 1.** The multiple correspondence analysis of 386 different plasmids which may be targeted by the CRISPR-Cas system in five of the strains containing ISs in their cas genes. Numbers inside the table represent the GenBank accession numbers.

**Supplementary Data 2.** Taxonomic analysis of 163 cases of ISs transpositions into cas genes.

**Supplementary Data 3.** The sample size information for supplementary figure 16.

**Supplementary Data 4.** The sample size information for supplementary figure 17.

**Supplementary Data 5.** The sample size information for supplementary figure 19.

**Supplementary Data 6.** The sample size information for supplementary figure 21.
